# Supplementary material
Source: publisher figshare collection journal article supplement (https://plos.figshare.com/articles/dataset/_/132767)

# Supplementary Figure 1

Upk3b, GAPDH

Upk3b

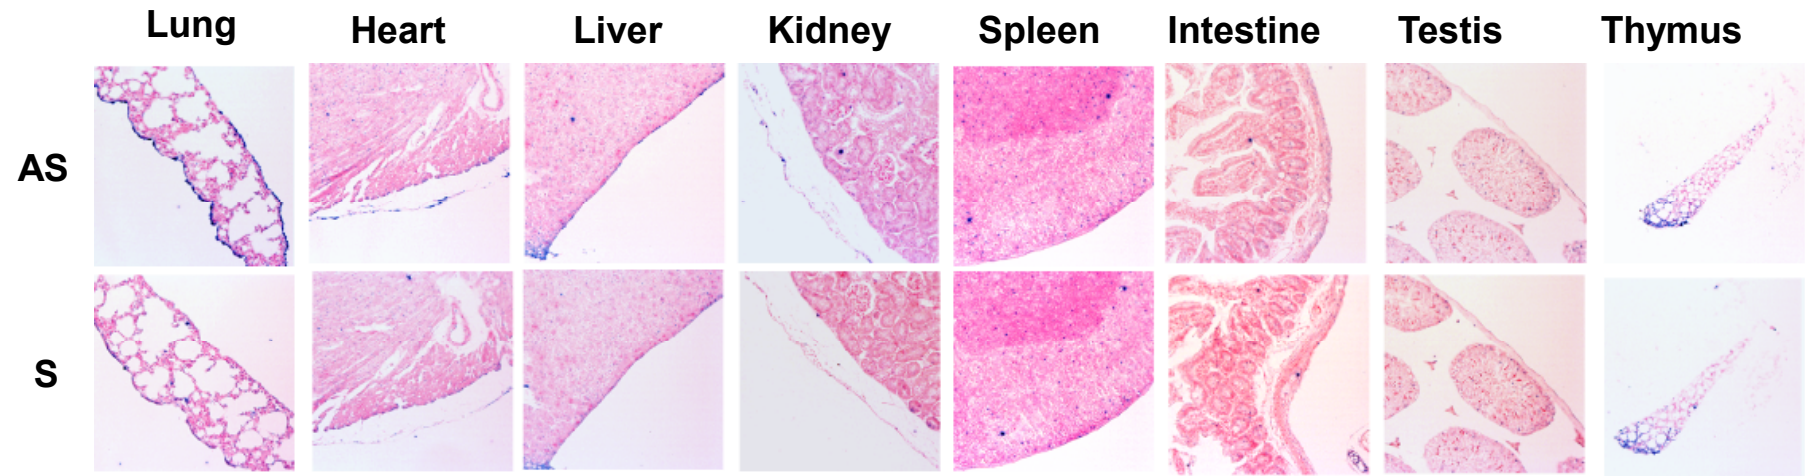

GAPDH

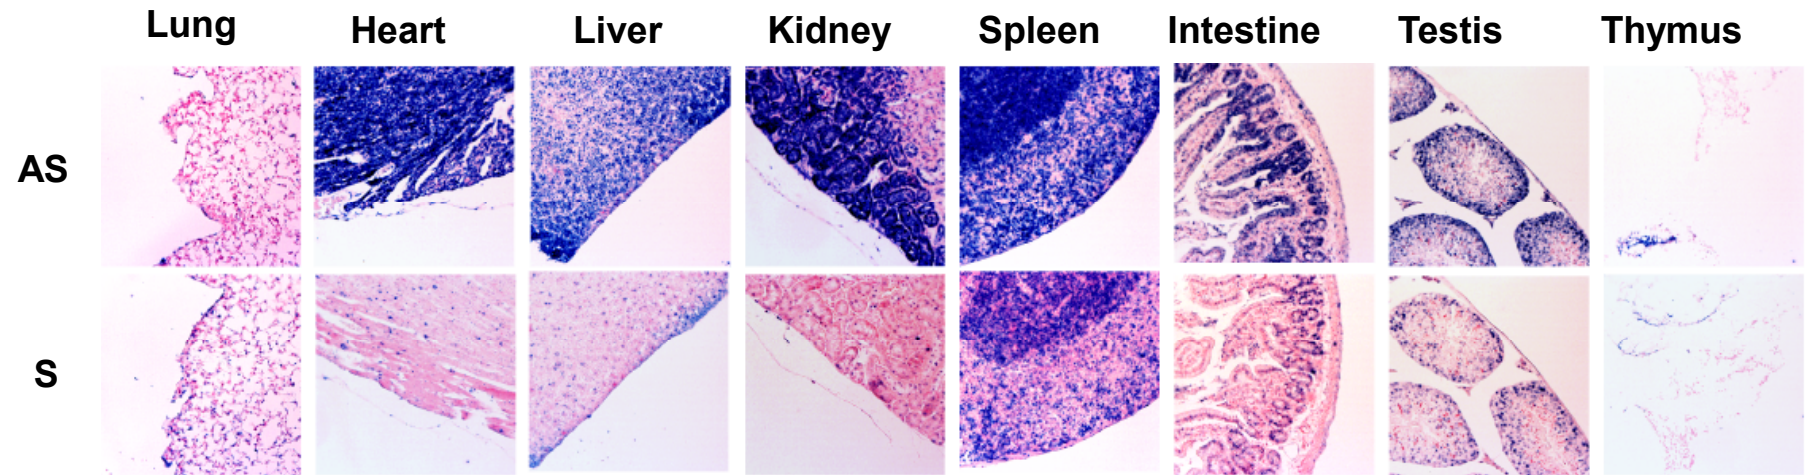

# Supplementary Figure 1 (continued)

C030019F02Rik, B430119L13Rik

Nkain4

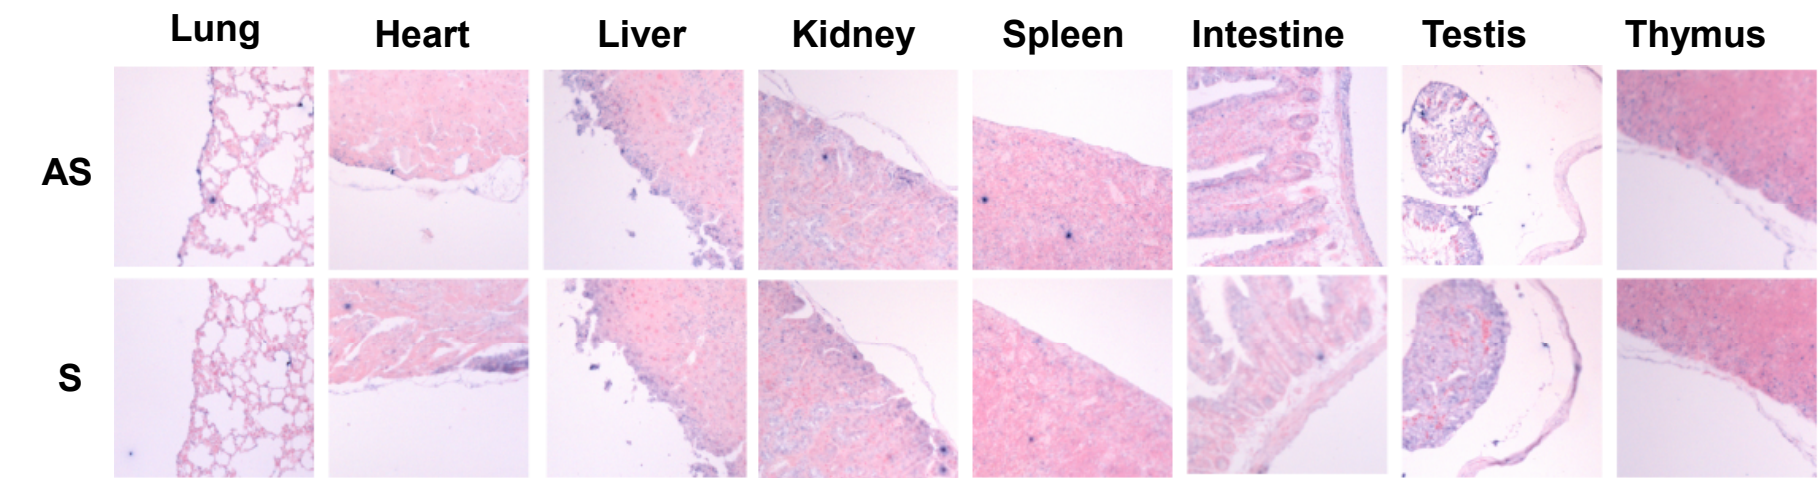

Lrrn4

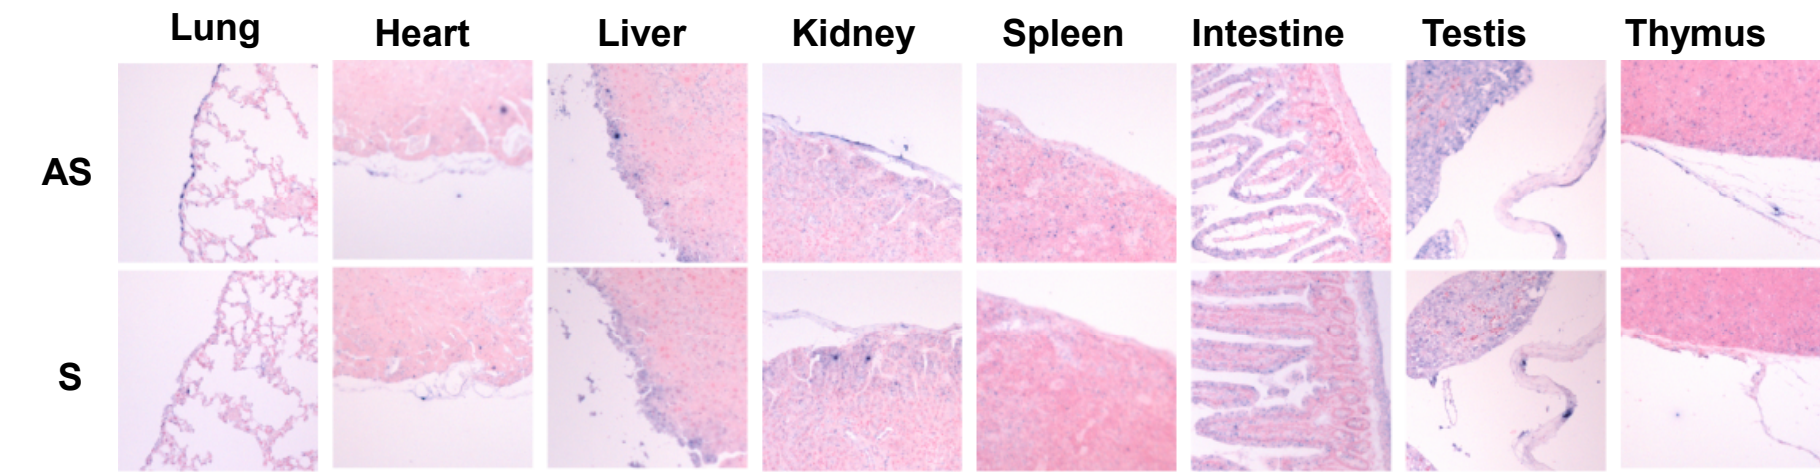

# Supplementary Figure 1 (continued)

Msln, Ptgis

Msln

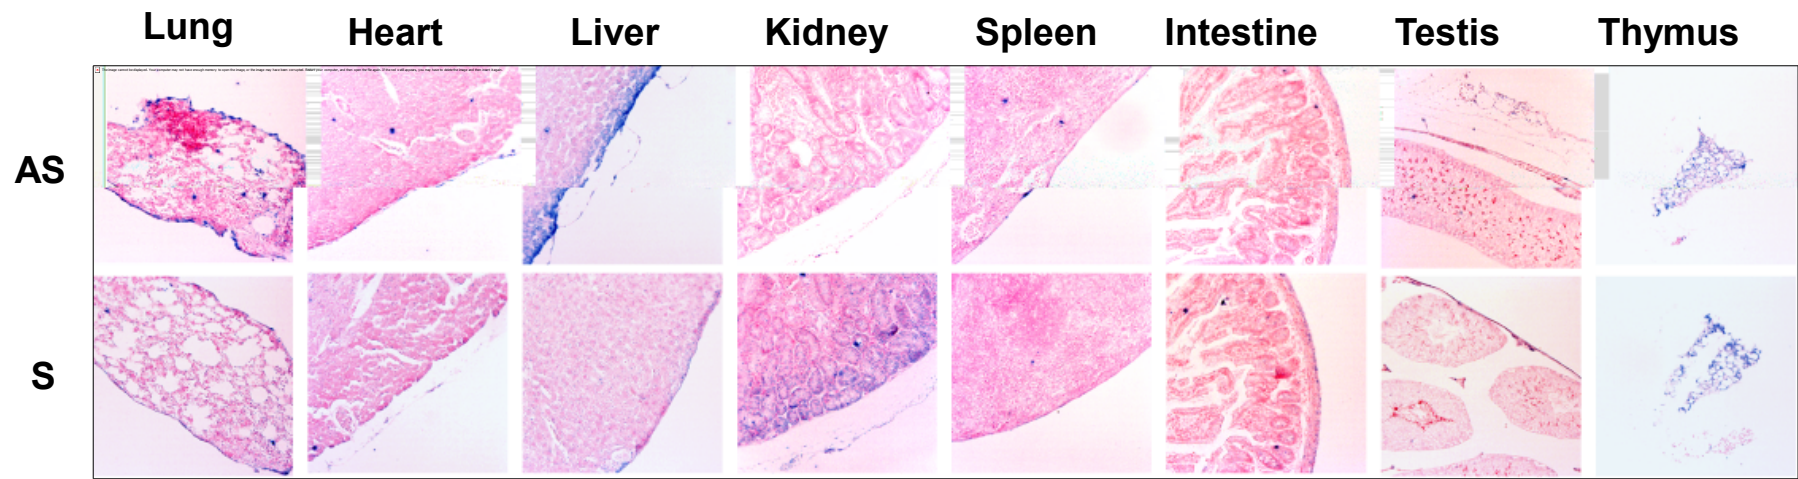

Ptgis

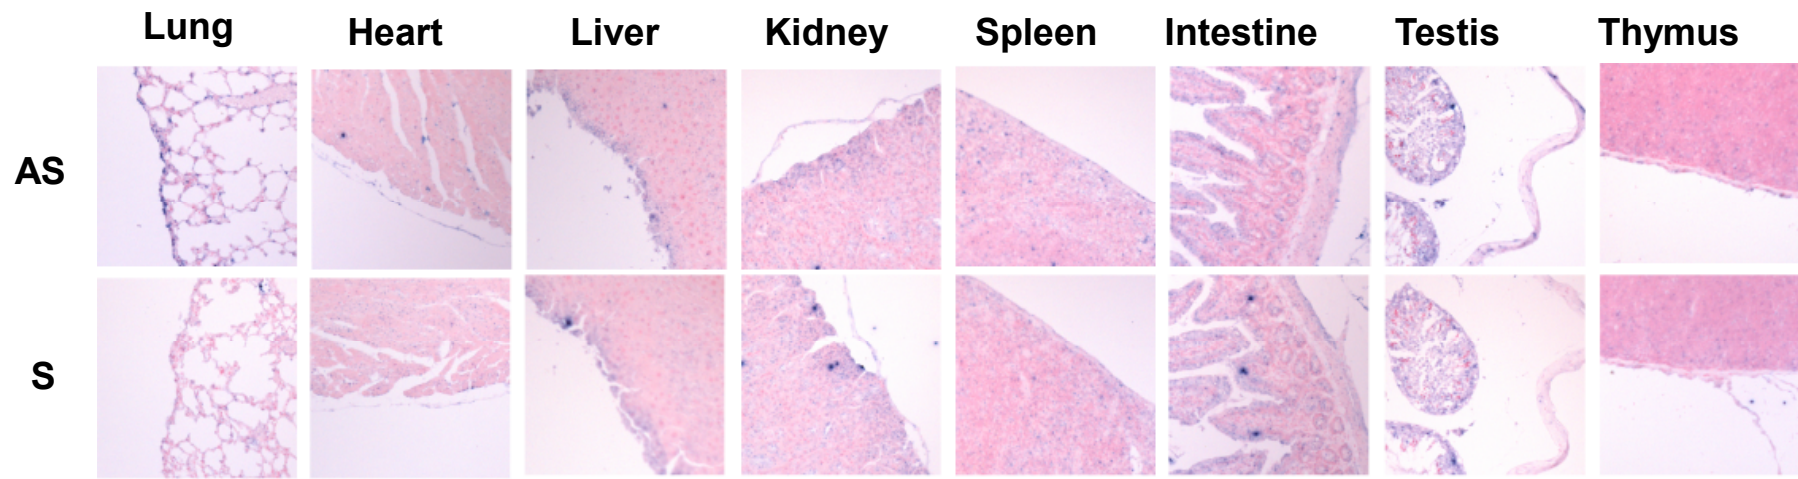

# Supplementary Figure 1 (continued)

Igfbp6, Prg4

Igfbp6

Lung      Heart      Liver      Kidney      Spleen      Intestine      Testis      Thymus

AS

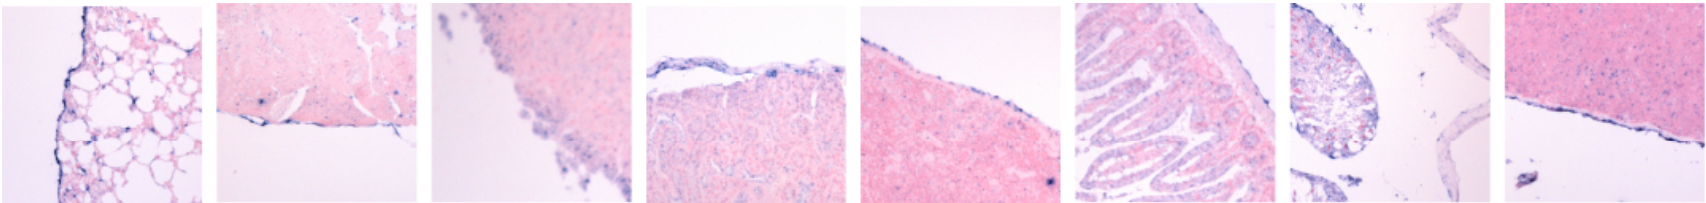

S

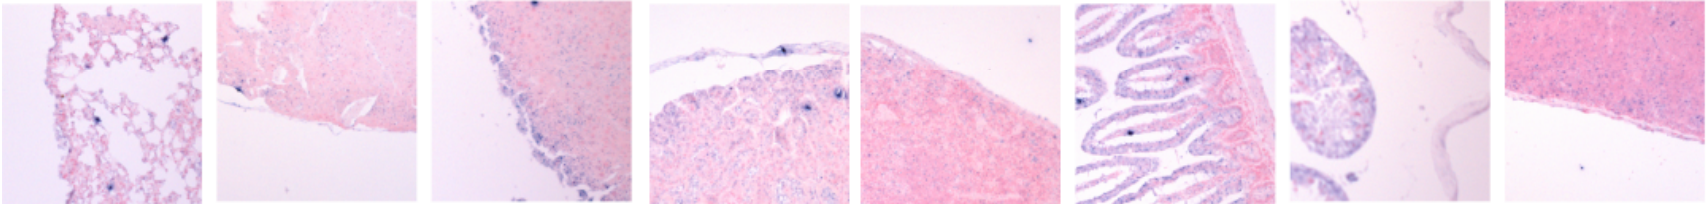

Prg4

Lung      Heart      Liver      Kidney      Spleen      Intestine      Testis      Thymus

AS

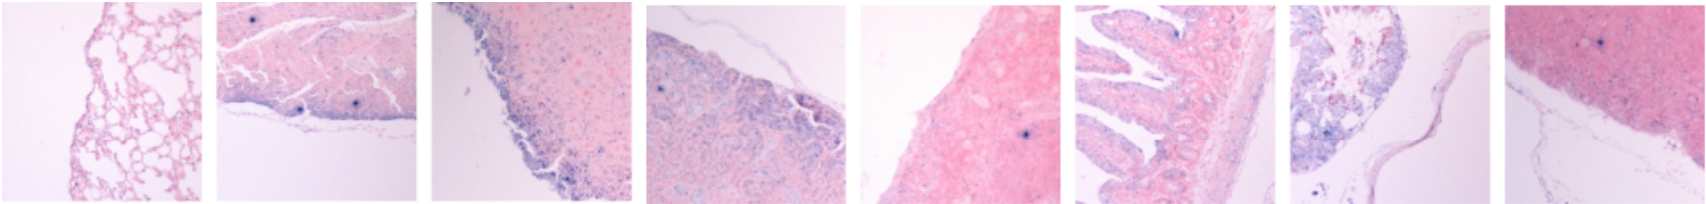

S

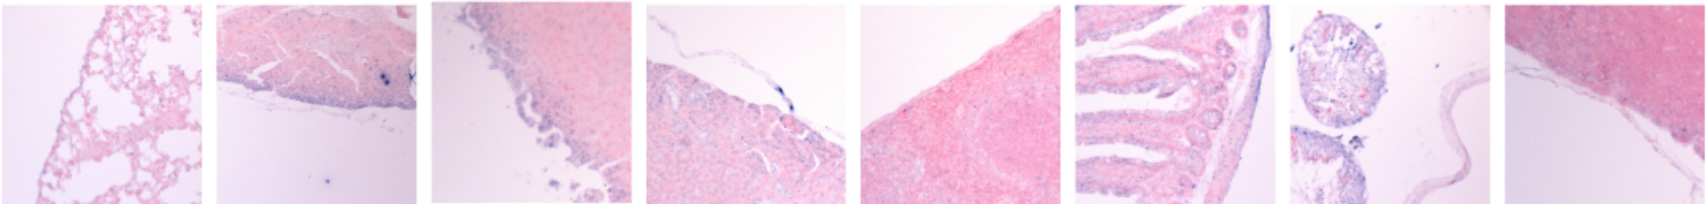

# Supplementary Figure 1 (continued)

Wt1, Mmp23

Wt1

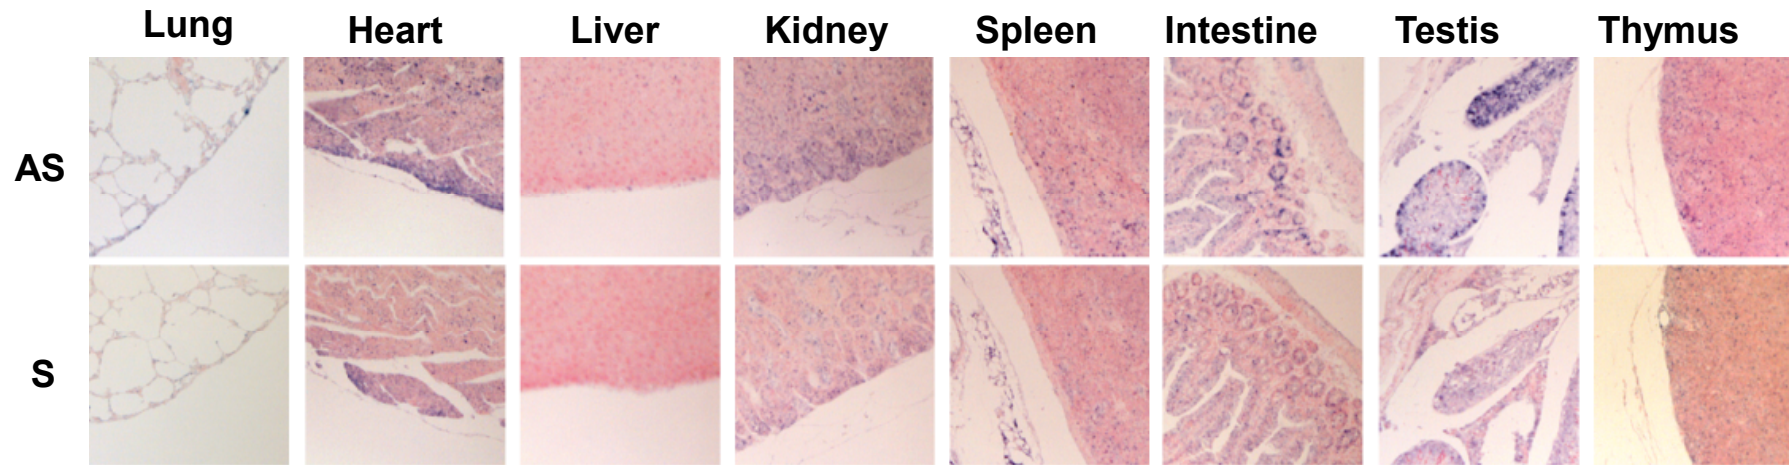

Mmp23

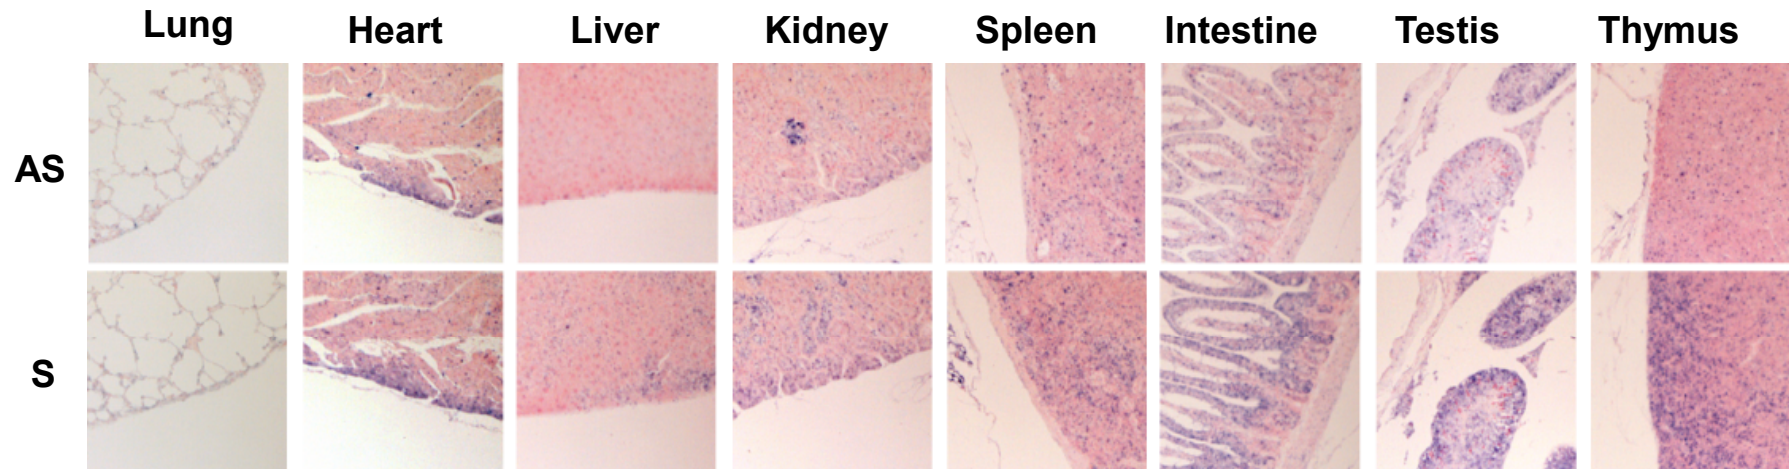

# Supplementary Figure 1 (continued)

BC064033, Selp

BC064033

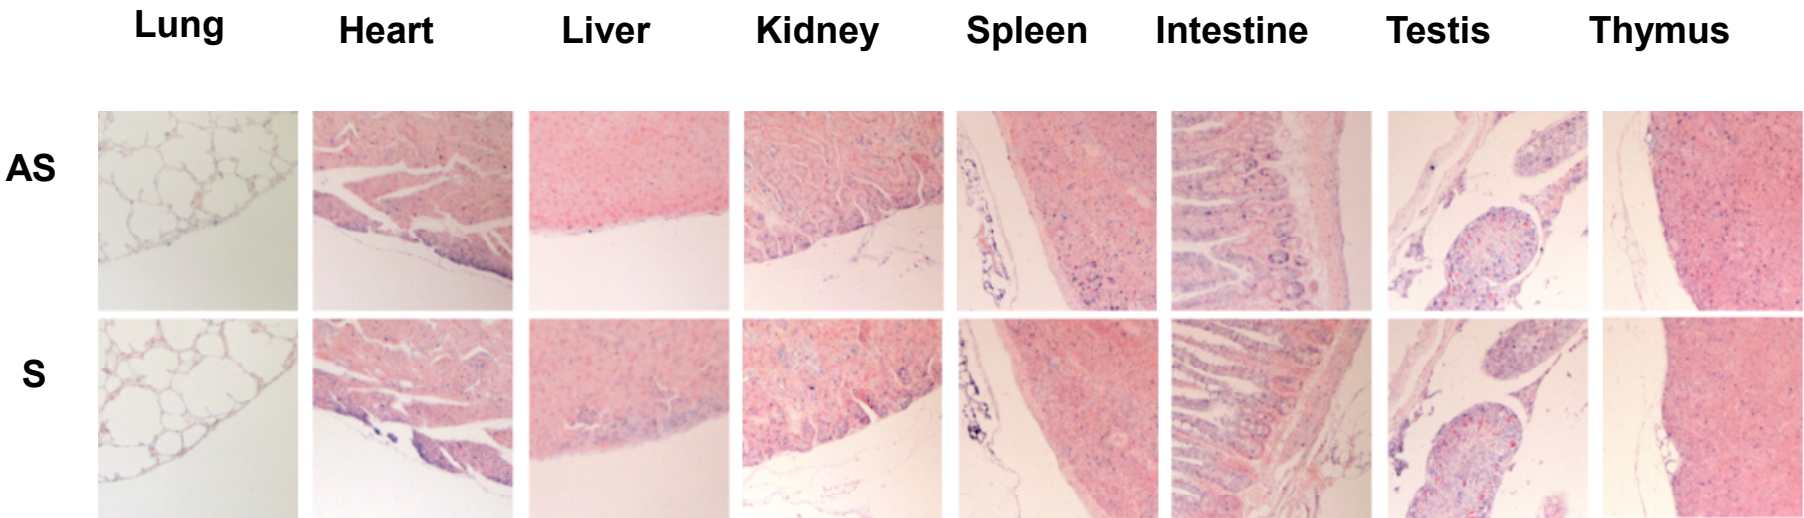

Selp

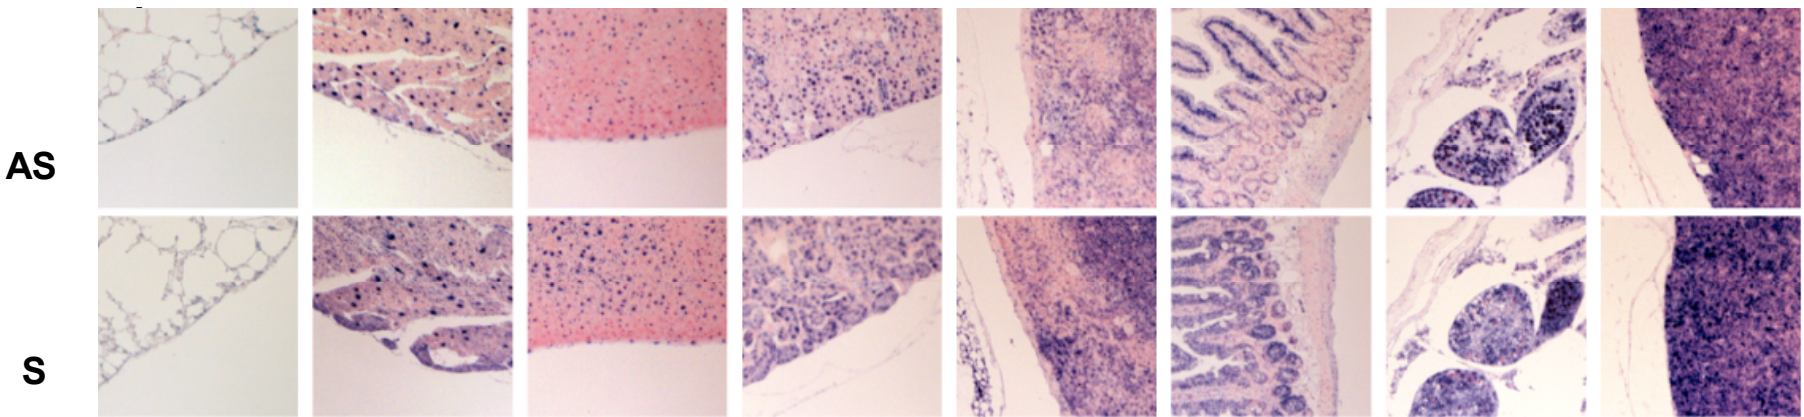

Supplement: Supplementary file 1 [file 1 › Figure_S1.pdf]
