# Supplementary material
Source: publisher figshare collection journal article supplement (https://plos.figshare.com/articles/dataset/_/132767)
Supplement: Supplementary file 1 [file 1 › Figure_S2.pdf]

# Supplementary Figure 2

LRRN4 (NM\_152611)

|                    |                    |                   |                    |                    |
|--------------------|--------------------|-------------------|--------------------|--------------------|
| MRQTLPLLLL         | TVLRPSWADP         | PQEKVPLFRV        | TQQGPWGSSG         | SNATDSPCEG         |
| LPAADATAALT        | LANRNLRLP          | GCLPRTLRL         | DASHNLLRAL         | STSELGHLEQ         |
| LQVLTLRHNR         | IAALRWGP           | PAGLHTLDLS        | YNQLAALLPC         | TGPALSSLRA         |
| LALAGNPLRA         | LQPRAFACFP         | ALQLNLNSCT        | ALGRGAQGGI         | AEAAFAGEDG         |
| APLVTLEVLD         | LSGTFLERVE         | SGWIRDLPKL        | TSLYLRKMPR         | LT <b>TLEGDIFK</b> |
| <b>MTPNLQQLDC</b>  | QDSPALASVA         | THIFQDTPHL        | QVLLFQNCNL         | SSFPPWTLD          |
| <b>18mer</b>       |                    |                   |                    |                    |
| SQVLSINLFG         | NPLTCSCDLS         | WLLTDAKRTV        | LSRAADTMCA         | PAAGSSGPFS         |
| ASLSLSQLPG         | VCQSDQSTTL         | GASHPPCFNR        | STYAQGTVA          | PSAAPATRPA         |
| GDQQSVSKAP         | NVGSRTIA <b>AW</b> | <b>PHSDAREGTA</b> | <b>PSTTNS</b> VAGH | SNSSVFPRAA         |
|                    | <b>C+18mer</b>     |                   |                    |                    |
| STTRTQHRGE         | HAPELVLEPD         | ISAASTPLAS        | KLLGPFPTSW         | DRSISSPQPG         |
| QRTHATPQAP         | NPSLSEGEIP         | VLLLDYSEE         | EEGRKEEVGT         | PHQDVPCDYH         |
| PCKHLQTPCA         | ELQRRWRCRC         | PGLSGEDTIP        | DPPRLQGVTE         | TTDTSALVHW         |
| CAPNSVVHGY         | QIRYSAEGWA         | GNQSVVGVIY        | ATARQHPLYG         | LSPGTTYRVC         |
| VLAANRAGLS         | QPRSSGWRSP         | CAAFTTKPSF        | ALLLSGLCAA         | SGLLLASTVV         |
| <b>LSACL</b> CRRGQ | TLGLQRCDTH         | <b>LVAYKNPAFD</b> | <b>DYPLGLQTVS</b>  |                    |
|                    | <b>C+19mer</b>     |                   |                    |                    |

- \* **C20orf75-A : TLEGDIFKMTPNLQQLDC (18mer)**
- \* **C20orf75-B : C+AWPHSDAREGTAPSTTNS (19mer)**
- \* **C20orf75-C : C+VAYKNPAFDDYPLGLQTVS (20mer)**

# Supplementary Figure 2 (continued)

1.UPK3B isoform a (NM\_030570).gnu  
2.UPK3B isoform b (NM\_182684).gnu  
3.UPK3B isoform c (NM\_182683).gnu

1:MGLPWGQPHLGLQMLLLALNCLRPSSLSLGEWGSWMDASSQTQGAGGPAGVIGPWAPAPLR 60

1:-----MGLPW 5

1:-----MGLPW 5

.....

61:LGEAAPGTPTPVSVAHLLSPVATELVPTPQITAWDLEGKVTATTFSLEQPRCVFDGLAS 120

6 :GQPHLGLQMLLLALNCLRPSSLSLELVPTPQITAWDLEGKVTATTFSLEQPRCVFDGLAS 65

6 :GQPHLGLQMLLLALNCLRPSSLSLELVPTPQITAWDLEGKVTATTFSLEQPRCVFDGLAS 65

.....\*.....\*\*\*\*\*

121:ASDTVWLVVAFSNASRGFQNPETLADIPASPQLLTDGHYMTLPLSPDQLPCGDPMAGSSG 180

66 :ASDTVWLVVAF**SNASRGFQNPETLADI**PASPQLLTDGHYMTLPLSPDQLP**CGDPMAGSSG** 125

66 :ASDTVWLVVAFSNASRGFQNPETLADIPASPQLLTDGHYMTLPLSPDQLPCGDPMAGSSG 125

\*\*\*\*\*

C+16mer

20mer

181:APVLRVGHHDHGCHQQPFCNAPLPGPGPYREDPRIHRHLARAANKQHDRHYLHPLFSGRPP 240

126 :**APVLRVGHHD**HGCHQQPFCNAPLPGPGPYRV**KFL****MDTRGSPRAETKWS**DPITLHQGKTPG 185

126 :APVLRVGHHDHGCHQQPFCNAPLPGPGPYREDPRIHRHLARAANKQHDRHYLHPLFSGRPP 185

\*\*\*\*\*.....\*

C+18mer

241:TLGLLGSlyHALLQPVVAGGGPGAAADRLLHGQALHDPHPHTQGRHTAGGLQAWPGPPP 300

186 :SIDTWPGRRSgSMIVITSILSSLAGLLLLAFLAASTMRFSSLWWPE**EAPEQLRIGSF**MGK 245

186 :TLGLLGSlyHALLQPVVAGGGPGAAADRLLHGQALHDPHPHTQGRHTAGGLQAWPGPPP 245

.....\*.....\*

C+18mer

301:QPQPLAWPLCMGLGEMGRRE-----

320

246 :**RYMT**HHIPPSEAATLPVGCKPGLDPLPSLSP

276

246 :QPQPLAWPLCMGLGEMGRRE-----

265

.....\*.....

\* **UPK3B-A : C+SNASRGFQNPETLADI (17mer)**

\* **UPK3B-B : CGDPMAGSGGAPVLRVGHHD (20mer)**

\* **UPK3Bb-A : C+KFLMDTRGSPRAETKWS (19mer)**

\* **UPK3Bb-B : C+EAPEQLRIGSFMGKRYMT (19mer)**
