# Supplementary material
Source: publisher figshare collection journal article supplement (https://plos.figshare.com/articles/dataset/_/132767)
Supplement: Supplementary file 1 [file 1 › Table_S1.xls]

## Sheet: Mouse qRTPCR
Supplementary Table 1: qRTPCR primers and results for mesothelial specific genes
Candidates			Microarray result		qRTPCR primers		PHASE1 screening (12 tissues)																PHASE2 screening (+5 additional tissues)									female MESOTHELIUM
MGI Symbol	Human homolog	Illumina_probe ID	Enriched in mesothelium	Gene Ontology terms	fwd	rev	meso specific	Pleural + pericardial specific	peritoneal specific	pleura and pericardium	peritoneum	lung	adipose	heart	liver	brain	kidney	thymus	spleen	intestine	testis		meso specific	Pleural + pericardial specific	perioneal specific	bladder	skeletal muscle	colon	uterus	ovary		pleura and pericardium (female)	peritoneum
Lrrn4	LRRN4	scl0320974.1_66-S	both	integral to membrane, membrane	TGAGTTCCTTTGGTCCTTGG	TGTTGACATCCACGAGAAGC	yes	yes	yes	22.929	23.6545	30.2967	28.4787	32.3608	32.3608	28.7856	29.1688	27.0275	26.8524	27.1258	25.8049		yes	yes	yes	26.8352	34.6836	27.1691	31.9915	25.8743		22.8997	22.6147
Msln	MSLN	scl50176.16.1_35-S	peritoneal only	extracellular space	ACCTGAAGACCGAGGAGGAT	AAGTCCAGGACCAGGTAGCC	yes	yes	yes	20.46	19.6461	25.7736	24.055	22.7087	32.9901	27.4035	26.8476	24.5379	25.0959	26.0647	27.6392		yes	yes	yes	22.374	29.37	25.7662	27.4604	22.8072		20.6883	19.8915
Prg4	PRG4	scl096875.3_23-S	peritoneal only	extracellular space	GCCAATGAAGAAGTGCACAG	TCCTGAAGGTGTGTGTCTGG	yes	yes	yes	22.0037	21.3954	27.5839	25.2253	25.8714	23.8524	25.3092	29.6402	27.0021	25.9111	28.5554	27.2743		yes	yes	yes	27.0228	24.8005	29.6294	32.2859	24.6696		23.7954	20.9122
Nkain4	NKAIN4	scl18218.8.1_97-S	both	integral to membrane, extracellular space, membrane	AATGAGGAGACCCCAGTCCT	CAGTTGTAGCCACCCTGTCC	yes	yes	yes	19.8947	19.7196	22.8593	26.7518	30.2176	30.2176	21.4717	27.3	25.3186	25.8643	26.0882	25.2319		yes	yes	yes	23.1075	28.7396	26.2905	27.5139	23.6888		20.3227	19.347
Igfbp6	IGFBP6	scl016012.5_14-S	peritoneal only	extracellular, extracellular space	CCGCAGACACTTGGATTCAG	AGAAGCCTCTGAGGTCACAGTT	yes	yes	yes	18.6391	16.7422	23.4997	22.5329	20.9959	27.2112	22.2978	24.4503	24.0446	23.2404	23.9623	21.7667		yes	yes	yes	20.1061	22.0147	23.6881	20.7253	20.6141		18.9586	16.6048
Upk3b	UPK3B	scl00100647.2_230-S	both	endoplasmic reticulum, integral to membrane, membrane	AATCCCAACTCCATTGACACA	TAGTGGAAGCTGCCAGGAAA	yes	yes	yes	20.0048	20.0855	22.2633	26.8872	24.1871	30.254	33.9626	25.4198	26.3748	25.4754	25.5194	28.1398		yes	yes	yes	21.5334	30.8144	25.7726	28.688	23.32		20.6421	19.759
Ptgis	PTGIS	scl019223.1_1-S	peritoneal only	integral to membrane, endoplasmic reticulum, extracellular space, membrane, microsome	CCGATTCTTGAACCCAGATG	TTTGATGCTGTTGATGGCATA	yes	yes	yes	21.0938	20.4193	25.2354	25.2103	24.4638	25.7811	26.6283	25.3236	26.7368	24.3449	25.9925	23.5644		yes	yes	yes	22.4184	26.3091	26.3382	23.4925	22.7621		22.0021	20.3345
Fam180a	FAM180A	scl29154.3_539-S	peritoneal only	0	GAGGCCCTTGCTTTCCTTAT	CAGGAGGGAGACAAGCTGAC	yes	yes	yes	25.7913	25.4869	28.2434	32.4669	30.8235	30.8235	27.0924	29.8967	30.5412	28.842	29.062	29.0184		yes	yes	yes	28.1206	30.5037	29.0437	32.1161	26.7562		26.2023	25.0266
Tmem119	TMEM119	scl26192.3_15-S	peritoneal only	0	ACCCGCACTGGAAAATACTG	CAGGGTTGCTTGACACTTGA	yes	yes	yes	20.7716	19.9454	26.0587	25.0615	35.0059	35.0059	23.1691	23.6449	24.5957	25.2131	23.4833	27.2616		yes	yes	yes	23.6777	26.1985	23.6765	21.49	23.3427		21.5453	19.9303
Mmp23	MMP23B	scl23434.8.1_51-S	peritoneal only	extracellular space, extracellular matrix	CACCACATCACCCACCAG	TACTTTCCCTTTCTTGTGTAGGA	yes	yes	yes	21.9855	21.606	26.3375	25.5898	25.4452	30.4692	25.8266	25.1854	26.1404	23.184	25.9648	26.3986		yes	yes	yes	23.5999	26.9406	25.5523	22.6216	22.7629		22.2717	21.7263
Selp	SELP	scl17286.15.1_2-S	peritoneal only	membrane, integral to membrane, extracellular space, membrane fraction, platelet alpha granule membrane	CAGGGACACTGACAATCCAG	GCTTTCTTAGCAGAGCCAGGA	yes	yes	yes	26.591	25.3256	28.9534	30.2963	30.8791	32.2865	34.7808	31.3472	28.0235	27.0591	28.4578	27.8323		yes	yes	yes	28.5216	31.1759	28.658	28.8517	27.7341		26.7048	24.4054
Saa3	SAA1	scl31343.5.1_35-S	both	extracellular, extracellular space	GCTGGCCTGCCTAAAAGATA	GCACATTGGGATGTTTAGGG	yes	yes	yes	21.7488	19.1838	24.6836	26.6585	26.4395	23.7326	30.6723	28.9177	22.8544	26.1111	25.106	25.8838		yes	yes	yes	27.0837	28.0671	25.4259	26.5069	22.1309		22.1882	17.9249
Fbln2	FBLN2	scl014115.17_10-S	peritoneal only	extracellular matrix, extracellular, extracellular space	CAATGAGGAGGGCTACTTCG	TTGGCCAGGAAGGTAGTGAC	yes	yes	yes	20.5309	19.4446	23.6727	22.5811	22.4732	26.8863	25.2406	24.8853	22.6081	24.2933	24.2345	26.1466		yes	yes	yes	22.9396	22.7742	24.4452	20.744	23.0541		21.0579	19.8693
Aebp1	AEBP1	scl41866.19_12-S	peritoneal only	extracellular space, nucleus	CCTGCACACAAACTGTCTGG	GCGCTTCTTTGTTGTTCTCC	yes	yes	yes	20.6094	19.8987	22.6584	23.0493	23.7088	29.546	23.2124	21.758	24.7499	23.0006	23.5685	24.0018		no	no	yes	21.137	22.7517	23.7941	21.5813	20.2488		20.8803	19.4297
Muc16	MUC16	scl36182.9.1_19-S	peritoneal only	0	CCAAGTTCAACGTCATCGTC	TTGAACCCTGCTAGGGAAGA	yes	yes	yes	23.8049	22.3453	26.6958	26.5871	30.4927	30.4927	35.2284	30.6852	27.5282	28.5321	32.1329	23.5925
1500015O10Rik	C2orf40	scl18005.4.1_0-S	peritoneal only	extracellular space	ATCGAAACGGCCATGACTAC	GTTGACACTGGCTCCATGC	yes	yes	yes	23.9646	22.2916	25.7731	27.4657	26.0398	31.6746	23.0444	26.1217	27.2849	25.5892	28.6091	27.5976
Disp1	DISP1	scl068897.1_240-S	peritoneal only	integral to membrane	AATCCCAACTGGAGCATGAG	AAAAATTCGGAGCAGGTGTG	yes	yes	yes	26.402	25.6237	29.126	31.0384	29.2873	38.362	26.8145	27.9346	25.98	28.569	28.7543	27.1551
Cxcl13	CXCL13	scl27566.4_105-S	pleural + pericardial only	extracellular, extracellular space	TCTGCAAGCAACCAAAGAAA	CTCGTACATCGTGGCTTTGA	no	yes	no	19.7851	23.5298	27.4604	22.7938	24.2627	27.9294	31.888	28.6553	26.4837	20.3767	24.215	29.0376
Sulf1	SULF1	scl00240725.2_185-S	both	extracellular space, Golgi apparatus, endoplasmic reticulum	CACACAGTAGAACGGAGCATCT	ATGTCCAGGCTCTTGGGTCT	no	yes	no	24.1676	25.2909	28.2321	27.8748	25.5214	30.3713	24.4549	26.6174	24.7212	24.5456	25.8303	24.5137
Wnt2b	WNT2B	scl21710.5_259-S	both	extracellular	TGTGTCAACGCTACCCAGAC	GGTCCAGTGTGGTGCAATTC	no	no	no	27.6812	26.7736	28.3032	35.5052	32.3457	31.6141	27.8664	28.577	28.8968	27.8104	26.5726	26.9388
Fam70a	FAM70A	scl0245386.1_3-S	both	0	TAAAAGTCCACCGGGCATAG	CCCAGTGAATGTGTTCATGC	no	no	no	24.3146	22.0751	30.048	30.2506	31.5453	31.5453	21.8513	28.9609	26.7084	24.693	27.5134	22.3087
Plat	PLAT	scl33993.13_72-S	peritoneal only	extracellular, extracellular space, apical part of cell, cytoplasm, secretory granule	TCTTCTCTGACCGGCTGAAG	GCACAGCATGTTGTTCGTG	no	no	no	23.6606	22.8352	26.1415	26.4556	26.1045	27.0947	23.4636	22.5439	25.7265	26.6279	25.1537	23.8546
Svs5	N/A	scl19941.3.19_3-S	peritoneal only	extracellular space	AGGCAGTGGATCAGGTTCTG	GCTGCTGCTACTGCTTTCCT	no	no	no	27.6884	23.8893	34.6247	31.4013	32.2482	26.3576	30.6995	35.1017	30.3678	30.7129	27.9336	23.5629
Tmem98	TMEM98	scl41166.7_90-S	peritoneal only	extracellular space	TGCTGCTGTCCGTTAGTCAC	GACTTCCAGGTGCTCCTCAG	no	no	no	22.2274	21.9749	22.9388	26.8483	31.6319	31.6319	23.6907	24.6186	26.1569	24.1998	21.167	24.7303
Dlk1	DLK1	scl42790.6_48-S	peritoneal only	integral to membrane, extracellular space, membrane	TGGCTTCTCAGGCAACTTCT	GGTCTTGTCGACGAATCCAG	no	no	no	27.0224	24.6218	32.0407	30.8037	34.7095	28.3662	23.1902	26.2247	28.122	29.4023	27.8404	25.8571
Vit	VIT	scl50486.15.1_59-S	both	extracellular space	AGACAATCCTGCTACCCAGTTT	ATTAGAAAGGCCTCCTCTCTGG	no	no	no	25.2344	25.1485	30.8539	31.4825	28.9261	34.7974	25.8352	28.3759	27.1247	28.9297	27.1814	23.1411
Crip1	CRIP1	scl012925.2_22-S	both	0	AGTCCAGAGCCTGCAACCTA	AATACACCTCCTTGTCGCACTT	no	no	no	18.1805	17.7136	20.9394	21.591	21.3037	37.9928	23.4909	22.605	19.182	19.3286	15.4519	23.3818
Sema5a	SEMA5A	scl0020356.1_230-S	peritoneal only	integral to membrane, membrane, extracellular space	CCAGAGGTACCAGCAGCAGT	CTTGATGGCCTCCACAGAAT	no	no	no	26.2252	26.1681	27.3544	32.865	31.3754	31.7384	24.1016	23.6974	26.7142	24.0383	23.8958	24.8062
Ttll12	TTLL12	scl00223723.2_285-S	peritoneal only	0	AGCTGTTCCAAGTGGCATGT	TTGTCCCAGTTGAGCATGAG	no	no	no	24.2575	24.8771	26.0072	28.555	34.4782	34.4782	24.3823	23.6783	22.3588	23.877	23.5062	23.4553
Fcna	FCN2	scl19548.10.1_41-S	pleural + pericardial only	microfibril, extracellular space, cytoplasm	AACCAAGAGCTCCGAGTTGA	CCCCAAGGTCAGCTTGTATT	no	no	no	19.6818	21.9326	39.606	22.9962	23.8288	23.2094	28.5704	26.2961	25.3908	19.3963	25.8565	26.2586
Flrt1	FLRT1	scl6163.1.1_218-S	peritoneal only	0	AGGAATTCGTTCCCAGCTTT	TCTGAAAGGCAGGGCTGA	no	no	no	22.0514	24.0126	25.7117	24.4414	22.1022	22.1022	23.4844	21.1593	23.6504	23.8572	23.2767	21.8606
Cldn15	CLDN15	scl27110.7.1_2-S	both	tight junction, integral to membrane, membrane, extracellular space	GGCACACCTTATCTGGCACT	CACATGCTGCAGACACCTCT	no	no	no	21.0131	21.1729	23.9117	25.0364	24.7198	30.7554	29.4609	23.8656	26.9976	24.9523	18.2996	27.8387
Smpd3	SMPD3	scl34375.12_133-S	both	Golgi apparatus, integral to membrane, Golgi stack, membrane	CAGGGAGTATCTGGCCTTCC	CGTGCAGCATGTAGTCGATG	no	no	no	24.1192	24.2796	28.8644	28.1374	28.6266	38.9568	22.9455	29.3696	27.7828	28.2159	21.867	21.4039
Igfbp5	IGFBP5	scl016011.3_113-S	pleural + pericardial only	extracellular, extracellular space	GCCGCAGACACATGGAAG	TGTAGAATCCTTTGCGGTCA	no	no	no	22.2412	24.7198	21.8854	28.5047	26.7507	31.0857	22.0892	20.3019	22.2014	24.5977	23.5021	26.7036
Sdc3	SDC3	scl24887.7_12-S	pleural + pericardial only	integral to membrane, membrane	GCGCAATGAGAACTTCGAG	GAGCCTGACCCCGAGTAGAG	no	no	no	25.9116	27.538	28.5926	29.5004	25.096	32.001	22.9425	25.6873	26.4207	23.2321	26.0613	21.7174
Tbata	C10orf27	scl0065971.2_58-S	pleural + pericardial only	0	GGGACGAGTTCTCTCTGTCG	GTTCCGATTGGACTGTGGAT	no	no	no	23.9126	31.8587	27.8329	34.9787	35.288	35.288	24.7821	34.6032	18.2145	32.5738	28.2514	18.5588

## Sheet: Human qRTPCR Primers
Human homolog	fwd	rev	Amplicon
MSLN*	GAATGTGAGCATGGACTTGG	ACGTGGGGTCCCAGAAGT	GAATGTGAGCATGGACTTGGCCACGTTCATGAAGCTGCGGACGGATGCGGTGCTGCCGTTGACTGTGGCTGAGGTGCAGAAACTTCTGGGACCCCACGT
UPK3B	TGTGTCTTCGATGGGCTTGCCA	AATGTCAGCCAGTGTCTCCGGGTT	TGTGTCTTCGATGGGCTTGCCAGCGCCAGCGATACCGTCTGGCTCGTGGTGGCCTTCAGCAATGCCTCCAGGGGCTTCCAGAACCCGGAGACACTGGCTGACATT
NKAIN4	TTAAGAGGCCACCGACTTCCAGGTA	ACATCATCATCGTCATCCTGGGAC	TTAAGAGGCCACCGACTTCCAGGTAGAAGCAGATGATGAAGACGTTCCAGGTGACCCAGACGGCTGCCCATAGCGCAGCCGGTACTGGATGGTGCCGAAGAGTCCCAGGATGACGATGATGATGT
LRRN4	TTCCTCAGGTAGAGGGATGTGAGCTT	TGGTCACGCTCGAAGTCCTGGAT	TTCCTCAGGTAGAGGGATGTGAGCTTCGGCAGGTCTCTGATCCACCCTGACTCAACCCGTTCAAGGAACGTGCCGCTGAGATCCAGGACTTCGAGCGTGACCA
* from
