# Supplementary material
Source: publisher figshare collection journal article supplement (https://plos.figshare.com/articles/dataset/_/132767)
Supplement: Supplementary file 1 [file 1 › Table_S2.xls]

## Sheet: Sheet1
Symbol	RefSeq Accession	FANTOM CloneID	F-Seq	R-Seq
Upk3b	NM_009636	I420039P15	ATTTAGGTGACACTATAGAAggtggggtgcagttacacaa	AATACGACTCACTATAGGGCgcctggatgagtcggaaata
Ptgis	NM_008968	C130032H06	ATTTAGGTGACACTATAGAAagtgtcaaaaaccgcctgtg	AATACGACTCACTATAGGGCcttcagccgtttcccatctt
Igfbp6	NM_008344	F930013G21	ATTTAGGTGACACTATAGAAcagggcaaaaactctgacca	AATACGACTCACTATAGGGCtcggaagacctcagtctgga
Mmp23	NM_011985	I920018B17	ATTTAGGTGACACTATAGAAgggcagctcagggaaatgta	AATACGACTCACTATAGGGCgtggcattgaggtgcatgag
Msln	NM_018857	I920057I12	ATTTAGGTGACACTATAGAAtcggtaccctccagtgtcat	AATACGACTCACTATAGGGCaatgacccctggtacccact
Prg4	NM_021400	C730019K03	ATTTAGGTGACACTATAGAAaccacgcagaattaccgaag	AATACGACTCACTATAGGGCctgccctgaacgtgtggtaa
NKAIN4	NM_021426	1810028H11	ATTTAGGTGACACTATAGAAaataccggccacgctacatc	AATACGACTCACTATAGGGCatgttaggcaggcagggaag
LRRN4	NM_177303	B430119L13	ATTTAGGTGACACTATAGAAgccttccattgaacagagca	AATACGACTCACTATAGGGCtatcctccccactgagacca
Selp	NM_011347	I0C0011B12	ATTTAGGTGACACTATAGAAgggcatttgctgaggttctc	AATACGACTCACTATAGGGCtttggtggagggaaagtctg
Fam180a	NM_173375	B230314O19	ATTTAGGTGACACTATAGAAggactttcaagatgcctcca	AATACGACTCACTATAGGGCttttaggagcacccaagtcg
Wt1	NM_144783	3021401A19	ATTTAGGTGACACTATAGAAaaacctggaaacctggaagg	AATACGACTCACTATAGGGCacaacaacacacgcacacct
