# Supplementary material
Source: publisher figshare collection journal article supplement (https://plos.figshare.com/articles/dataset/_/132767)
Supplement: Supplementary file 1 [file 1 › Table_S3.xls]

## Sheet: Supp1_upreg in meso
Illumina ProbeID	peritoneal_fold_change	peritoneal_min_Bstat	pleural_fold change	pleural_min_Bstat	Mesothelial enriched	min_Bstat	pleural vs peritoneal_fold_change	pleural vs peritoneal_Bstat	Curated_symbol	description
scl25173.8.38_156-S	16.0487	20.5224	8.11818	15.3744	both	15.3744	1.97688	-0.598497	Acot11	acyl-CoA thioesterase 11
scl27122.6_208-S	9.94457	23.3039	4.14447	14.4841	both	14.4841	2.39948	6.61326	Upk3b	uroplakin 3B
scl47198.5_117-S	13.4257	21.964	4.68721	12.4655	both	12.4655	2.86433	6.43827	Tnfrsf11b	tumor necrosis factor receptor superfamily, member 11b (osteoprotegerin)
scl29162.1.1_12-S	7.57594	12.3886	7.85681	12.6962	both	12.3886	0.964251	-6.8293	2010107G12Rik	RIKEN cDNA 2010107G12 gene
scl17576.8.1_5-S	35.4345	22.6249	7.49567	12.3163	both	12.3163	4.72733	8.10441	Serpinb2	serine (or cysteine) peptidase inhibitor, clade B, member 2
scl51904.5_540-S	13.29	19.1242	5.02674	10.7157	both	10.7157	2.64387	3.29193	A730017C20Rik	RIKEN cDNA A730017C20 gene
scl078917.2_95-S	8.77401	11.9622	6.91849	9.97969	both	9.97969	1.2682	-6.20716	4930455G09Rik	RIKEN cDNA 4930455G09 gene
scl0004097.1_46-S	11.2151	10.2464	9.6102	9.23495	both	9.23495	1.16699	-6.667	Cldn15	claudin 15
ri|2210407P13|ZX00079F11|AK008849|1067-S	5.77618	6.9379	7.40299	9.05735	both	6.9379	0.780251	-6.26513	Cybrd1	cytochrome b reductase 1
scl36905.1.71_309-S	12.3408	12.2021	6.05924	6.85592	both	6.85592	2.03669	-3.083	Rpp25	ribonuclease P 25 subunit (human)
scl26208.17_33-S	37.8271	15.2003	9.01174	6.85397	both	6.85397	4.19754	1.29474	Sez6l	seizure related 6 homolog like
scl071790.1_55-S	11.1622	17.0779	3.7359	6.7143	both	6.7143	2.98782	4.30659	Anxa9	annexin A9
scl36740.17.1_29-S	14.8676	8.60736	10.3364	6.35341	both	6.35341	1.43837	-6.19805	Aldh1a2	aldehyde dehydrogenase family 1, subfamily A2
scl31526.16.1_20-S	8.86058	7.2212	7.14328	5.77748	both	5.77748	1.24041	-6.54985	Aplp1	amyloid beta (A4) precursor-like protein 1
scl20522.1.1_4-S	21.2071	25.0995	2.71754	5.54161	both	5.54161	7.80381	17.573	4930415N12Rik	RIKEN cDNA 4930415N12 gene
scl50635.6.1_10-S	25.2384	15.992	5.21724	4.89906	both	4.89906	4.83749	4.49311	Trem2	triggering receptor expressed on myeloid cells 2
scl27110.7.1_2-S	11.7168	7.45095	7.48923	4.60556	both	4.60556	1.56449	-5.84185	Cldn15	claudin 15
scl44779.2.1_92-S	4.3669	11.9099	2.51976	4.48486	both	4.48486	1.73306	-1.12563	Nxnl2	nucleoredoxin-like 2
scl0192190.76_1-S	9.29371	10.2105	4.54481	4.37812	both	4.37812	2.04491	-3.02715	Pkhd1l1	polycystic kidney and hepatic disease 1-like 1
scl21082.4.1_25-S	4.2324	6.48386	3.40096	4.25121	both	4.25121	1.24447	-6.22634	Prrx2	paired related homeobox 2
scl027877.2_206-S	12.7448	16.3881	3.37495	4.18257	both	4.18257	3.77629	5.74622	Ildr2	immunoglobulin-like domain containing receptor 2
scl24980.6.1_14-S	17.4919	16.9637	3.58623	3.87997	both	3.87997	4.87752	7.0689	Rspo1	R-spondin homolog (Xenopus laevis)
scl34335.3_203-S	14.8498	7.67463	7.9476	3.77316	both	3.77316	1.86847	-5.21265	Chst4	carbohydrate (chondroitin 6/keratan) sulfotransferase 4
scl18218.8.1_97-S	8.53241	7.2219	5.4242	3.73768	both	3.73768	1.57303	-5.54298	Nkain4	Na+/K+ transporting ATPase interacting 4
scl51577.15_266-S	5.28535	6.15414	3.96491	3.44392	both	3.44392	1.33303	-6.07012	Celf4	CUGBP, Elav-like family member 4
scl20808.4_609-S	3.33012	3.15199	3.34198	3.20772	both	3.15199	0.996453	-6.84787	Cybrd1	cytochrome b reductase 1
scl022431.11_253-S	17.569	9.10962	6.41587	2.88487	both	2.88487	2.73837	-2.86691	Wt1	Wilms tumor 1 homolog
scl0320974.1_66-S	30.9093	7.16509	11.9981	2.7402	both	2.7402	2.57619	-4.73555	Lrrn4	leucine rich repeat neuronal 4
scl50486.15.1_59-S	16.0656	8.84637	6.01426	2.63425	both	2.63425	2.67125	-2.92835	Vit	vitrin
scl012925.2_22-S	5.46258	9.10001	2.91586	2.56013	both	2.56013	1.8734	-2.55379	Crip1	cysteine-rich protein 1 (intestinal)
scl0245386.1_3-S	55.082	20.4168	3.88942	2.5305	both	2.5305	14.162	12.9389	Fam70a	family with sequence similarity 70, member A
scl071780.11_24-S	4.54364	2.38722	4.82963	2.90918	both	2.38722	0.940785	-6.82255	Isyna1	myo-inositol 1-phosphate synthase A1
GI_21746160-S	7.58811	6.56822	4.42239	2.27242	both	2.27242	1.71584	-4.99748	Tubb2b	tubulin, beta 2B
scl00399558.1_229-S	4.41302	2.57147	4.25682	2.25284	both	2.25284	1.03669	-6.83848	Flrt2	fibronectin leucine rich transmembrane protein 2
ri|A530019B01|PX00140M19|AK040711|1694-S	7.82947	8.69236	3.55665	1.98741	both	1.98741	2.20136	-2.47443	Cdon	cell adhesion molecule-related/down-regulated by oncogenes
scl54197.4_379-S	9.34961	11.0727	3.29945	1.93375	both	1.93375	2.83369	0.539423	Slitrk4	SLIT and NTRK-like family, member 4
scl54569.3_223-S	5.97666	7.30607	3.35944	1.84805	both	1.84805	1.77907	-3.99771	A730046J19Rik	RIKEN cDNA A730046J19 gene
scl54301.2.1_247-S	3.09656	2.63331	2.84891	1.67964	both	1.67964	1.08693	-6.75893	Dcaf12l2	DDB1 and CUL4 associated factor 12-like 2
scl31841.3.1_160-S	13.5902	18.5997	2.41168	1.61211	both	1.61211	5.63515	11.3689	D930030F02Rik	RIKEN cDNA D930030F02 gene
scl21710.5_259-S	20.2941	16.3451	3.20206	1.43516	both	1.43516	6.33784	8.11849	Wnt2b	wingless related MMTV integration site 2b
scl50269.3.1_250-S	4.30949	1.34159	5.92955	3.86638	both	1.34159	0.726783	-6.23619	Has1	hyaluronan synthase1
scl25932.2.1_17-S	2.11505	1.66071	2.044	1.27895	both	1.27895	1.03476	-6.81962	2010001M06Rik	RIKEN cDNA 2010001M06 gene
scl39967.13.1_225-S	4.92349	5.73282	3.06218	1.26712	both	1.26712	1.60784	-4.82219	Spns3	spinster homolog 3 (Drosophila)
scl31343.5.1_35-S	27.1491	15.1758	3.78269	1.14912	both	1.14912	7.17718	6.73515	Saa3	serum amyloid A 3
scl066815.2_36-S	4.32724	5.61689	2.7667	1.06013	both	1.06013	1.56404	-4.76017	Ccdc109b	coiled-coil domain containing 109B
scl48785.4.1_310-S	4.23853	8.25162	2.32062	0.975769	both	0.975769	1.82646	-2.02097	Tmem114	transmembrane protein 114
scl00319202.1_96-S	4.60654	6.06157	2.79665	0.82133	both	0.82133	1.64716	-4.32404	#N/A	no hit
scl34375.12_133-S	8.22295	8.59788	3.09114	0.351437	both	0.351437	2.66017	-0.984977	Smpd3	sphingomyelin phosphodiesterase 3, neutral
scl0234267.8_19-S	4.15302	3.49842	2.97112	0.277565	both	0.277565	1.3978	-5.86622	Gpm6a	glycoprotein m6a
scl00240725.2_185-S	2.89711	2.56487	2.37183	0.120786	both	0.120786	1.22147	-6.29045	Sulf1	sulfatase 1
scl32853.5.1_65-S	8.9194	0.0703425	8.86869	0.212294	both	0.0703425	1.00572	-6.84795	Lgals7	lectin, galactose binding, soluble 7
GI_34304055-S	200.646	15.3941	0.67434	-7.30701	peritoneal only	15.3941	297.543	16.5431	Defa20	defensin, alpha, 20
scl0013231.1_26-S	195.056	18.3099	0.911377	-7.30725	peritoneal only	18.3099	214.024	18.4066	Defa6	defensin, alpha, 6
GI_38093524-S	182.827	20.2339	0.796037	-7.2612	peritoneal only	20.2339	229.671	20.6625	AY761185	cDNA sequence AY761185
GI_13937346-S	175.299	16.456	0.505421	-7.20548	peritoneal only	16.456	346.839	18.4724	Defa6	defensin, alpha, 6
scl0013235.1_28-S	147.037	17.9588	0.696796	-7.27923	peritoneal only	17.9588	211.019	18.9732	Defa6	defensin, alpha, 6
GI_13937344-S	131.064	14.854	0.675378	-7.26214	peritoneal only	14.854	194.06	16.1565	Defa3	defensin, alpha, 3
scl013238.1_31-S	123.73	15.8917	0.46174	-7.17488	peritoneal only	15.8917	267.964	18.3701	Defa20	defensin, alpha, 20
scl53104.2_253-S	86.626	27.7182	0.653126	-7.257	peritoneal only	27.7182	132.633	27.9395	Nkx2-3	NK2 transcription factor related, locus 3 (Drosophila)
GI_31981802-S	71.8054	11.5224	0.934259	-7.30904	peritoneal only	11.5224	76.8581	11.8653	Defa23	defensin, alpha, 23
GI_6681166-S	61.9956	13.1661	0.769809	-7.30843	peritoneal only	13.1661	80.5338	14.2372	Defa-rs1	defensin, alpha, related sequence 1
scl0013236.1_28-S	60.2591	10.992	0.734971	-7.2929	peritoneal only	10.992	81.9885	12.2939	Defa17	defensin, alpha, 17
scl013240.1_57-S	59.3039	11.1706	0.671882	-7.21459	peritoneal only	11.1706	88.2653	12.8447	Defa6	defensin, alpha, 6
GI_6681172-S	55.3414	13.4989	0.819416	-7.26223	peritoneal only	13.4989	67.5376	14.3618	Defa5	defensin, alpha, 5
scl19941.3.19_3-S	53.8249	13.2284	3.16648	-2.94111	peritoneal only	13.2284	16.9983	7.71692	Svs5	seminal vesicle secretory protein 5
scl0002358.1_1625-S	47.7783	21.7354	1.84345	-3.58914	peritoneal only	21.7354	25.9179	18.3179	Trim9	tripartite motif-containing 9
scl23131.18_205-S	43.8065	19.839	0.932999	-7.21824	peritoneal only	19.839	46.9524	19.8044	Kcnab1	potassium voltage-gated channel, shaker-related subfamily, beta member 1
scl013239.1_40-S	41.0198	14.9587	0.604745	-7.22003	peritoneal only	14.9587	67.8298	17.1102	Defa5	defensin, alpha, 5
scl066298.1_12-S	40.6921	9.12321	1.02194	-7.26222	peritoneal only	9.12321	39.8185	9.11693	Defa22	defensin, alpha, 22
scl30661.9.1_0-S	33.284	7.90885	0.787939	-7.30192	peritoneal only	7.90885	42.2418	9.05021	Zg16	zymogen granule protein 16
scl0001020.1_68-S	26.5539	2.6026	0.855868	-7.30879	peritoneal only	2.6026	31.0257	3.51624	Reg3b	regenerating islet-derived 3 beta
scl51454.4.1_44-S	26.479	4.18853	0.659639	-7.19488	peritoneal only	4.18853	40.1416	6.20535	Spink3	serine peptidase inhibitor, Kazal type 3
scl15934.8.1_70-S	23.6793	7.52103	1.09545	-7.1489	peritoneal only	7.52103	21.616	7.26765	Itln1	intelectin 1 (galactofuranose binding)
scl21072.26_540-S	18.2314	17.7598	1.38631	-5.95929	peritoneal only	17.7598	13.151	15.5048	Lamc3	laminin gamma 3
scl43468.7_336-S	17.7376	6.61702	1.57122	-6.58877	peritoneal only	6.61702	11.2891	4.41548	Isl1	ISL1 transcription factor, LIM/homeodomain
scl26695.10.1_5-S	17.234	7.24748	1.98591	-5.25063	peritoneal only	7.24748	8.6781	3.47115	Cpz	carboxypeptidase Z
scl0018089.2_54-S	16.338	26.5408	0.876335	-7.27564	peritoneal only	26.5408	18.6436	26.2202	Nkx2-3	NK2 transcription factor related, locus 3 (Drosophila)
scl14355.1.1_113-S	14.9543	5.16337	2.87593	-4.17254	peritoneal only	5.16337	5.19982	-0.458123	Ildr2	immunoglobulin-like domain containing receptor 2
scl26213.1.3_304-S	14.8585	16.7983	1.57284	-4.52169	peritoneal only	16.7983	9.44694	13.5138	Miat	myocardial infarction associated transcript (non-protein coding)
scl0235505.44_49-S	14.5825	17.3202	0.895517	-7.30771	peritoneal only	17.3202	16.2838	17.8427	Cd109	CD109 antigen
scl41759.11.1_74-S	14.0909	7.08746	4.34641	-0.470416	peritoneal only	7.08746	3.24196	-2.0921	Efemp1	epidermal growth factor-containing fibulin-like extracellular matrix protein 1
scl36890.23.1_31-S	12.9376	14.8037	1.2352	-6.79931	peritoneal only	14.8037	10.474	13.3121	Stra6	stimulated by retinoic acid gene 6
scl00235505.2_132-S	12.8122	7.21635	1.11771	-7.2033	peritoneal only	7.21635	11.4629	6.78327	Cd109	CD109 antigen
scl0099663.2_281-S	12.3948	7.22837	0.924033	-7.3036	peritoneal only	7.22837	13.4138	7.90089	Clca6	chloride channel calcium activated 6
scl29154.3_539-S	12.0065	5.98493	3.9757	-1.20597	peritoneal only	5.98493	3.01998	-2.60735	Fam180a	family with sequence similarity 180, member A
scl0107376.6_174-S	11.54	16.8711	1.23102	-6.5897	peritoneal only	16.8711	9.3743	15.1995	E330013P04Rik	RIKEN cDNA E330013P04 gene
scl0023855.1_145-S	11.4006	4.73105	0.644886	-7.25617	peritoneal only	4.73105	17.6784	7.40043	Defa23	defensin, alpha, 23
scl20830.5_145-S	11.0196	10.1086	2.03063	-3.98398	peritoneal only	10.1086	5.42671	4.95995	Dhrs9	dehydrogenase/reductase (SDR family) member 9
scl26192.3_15-S	10.4714	6.60172	3.19259	-1.83166	peritoneal only	6.60172	3.2799	-1.30416	Tmem119	transmembrane protein 119
GI_38084801-S	10.2963	6.11497	3.47087	-1.44571	peritoneal only	6.11497	2.96649	-2.21233	Tmem151a	transmembrane protein 151A
scl016012.5_14-S	10.2004	12.9155	2.04099	-2.62914	peritoneal only	12.9155	4.99777	7.05715	Igfbp6	insulin-like growth factor binding protein 6
scl53763.13_504-S	10.0581	10.5769	2.27489	-2.51453	peritoneal only	10.5769	4.42137	4.09282	Capn6	calpain 6
GI_23622527-S	9.88345	2.23281	1.00513	-7.30931	peritoneal only	2.23281	9.83298	2.56406	AI747448	expressed sequence AI747448
scl017063.13_302-S	9.71135	1.77998	0.958845	-7.30798	peritoneal only	1.77998	10.1282	2.30885	Muc13	mucin 13, epithelial transmembrane
scl46981.3.21_13-S	9.7033	6.57592	2.10402	-4.52153	peritoneal only	6.57592	4.61178	1.53411	Lgals2	lectin, galactose-binding, soluble 2
scl000193.1_228-S	9.61784	9.34736	1.06904	-7.14308	peritoneal only	9.34736	8.99668	8.95346	Hif3a	hypoxia inducible factor 3, alpha subunit
scl51906.23.1_111-S	9.15659	5.83827	2.63831	-2.95849	peritoneal only	5.83827	3.47062	-0.827468	Adamts19	a disintegrin-like and metallopeptidase (reprolysin type) with thrombospondin type 1 motif, 19
scl33299.10_656-S	9.07336	14.3158	1.85643	-2.38533	peritoneal only	14.3158	4.88753	8.82619	Vat1l	vesicle amine transport protein 1 homolog-like (T. californica)
scl083767.9_235-S	8.86151	6.84272	2.12692	-3.88551	peritoneal only	6.84272	4.16636	1.34582	Wasf1	WASP family 1
scl37684.11_16-S	8.85516	12.02	2.26319	-1.29909	peritoneal only	12.02	3.9127	4.78438	Glt8d2	glycosyltransferase 8 domain containing 2
scl014009.13_0-S	8.69656	11.9829	1.93892	-2.81532	peritoneal only	11.9829	4.48525	6.26968	Etv1	ets variant gene 1
scl013218.2_2-S	8.65033	1.33441	0.730572	-7.30636	peritoneal only	1.33441	11.8405	3.17851	AY761184	cDNA sequence AY761184 (defensin related)
scl20997.14.1_151-S	8.64695	4.07072	3.14108	-2.69018	peritoneal only	4.07072	2.75286	-3.12671	Crb2	crumbs homolog 2 (Drosophila)
scl21071.1.1_82-S	8.63956	6.31093	0.717627	-7.23844	peritoneal only	6.31093	12.0391	8.76324	1110064A23Rik	RIKEN cDNA 1110064A23 gene
scl42790.6_48-S	8.56847	10.239	1.00125	-7.28114	peritoneal only	10.239	8.5578	10.3743	Dlk1	delta-like 1 homolog (Drosophila)
scl0320896.3_43-S	8.5429	6.92979	3.16498	-0.732695	peritoneal only	6.92979	2.6992	-1.8635	C330020E22Rik	RIKEN cDNA C330020E22 gene
scl31417.6_465-S	8.43177	9.16429	0.82522	-7.20078	peritoneal only	9.16429	10.2176	10.7477	Clec11a	C-type lectin domain family 11, member a
scl31875.20.1_3-S	8.42014	5.45237	0.592683	-7.10927	peritoneal only	5.45237	14.2068	9.06257	Muc2	mucin 2
scl0013233.1_27-S	8.34499	1.64472	0.957542	-7.27641	peritoneal only	1.64472	8.71502	2.18296	Defa23	defensin, alpha, 23
scl22330.11.693_178-S	8.21034	21.6211	0.734415	-7.05304	peritoneal only	21.6211	11.1794	23.4144	Nlgn1	neuroligin 1
scl8260.1.1_298-S	8.17771	5.49794	0.760791	-7.13126	peritoneal only	5.49794	10.749	7.56044	Gria3	glutamate receptor, ionotropic, AMPA3 (alpha 3)
scl22868.13.1_55-S	7.7919	10.322	1.37377	-6.23677	peritoneal only	10.322	5.67191	7.79674	Sv2a	synaptic vesicle glycoprotein 2 a
scl0004102.1_5-S	7.64207	2.61041	3.16647	-3.00653	peritoneal only	2.61041	2.41343	-4.16518	Upk3b	uroplakin 3B
scl068897.1_240-S	7.64045	5.7098	2.58323	-2.57635	peritoneal only	5.7098	2.95771	-1.36445	Disp1	dispatched homolog 1 (Drosophila)
scl36182.9.1_19-S	7.56875	6.5052	2.74252	-1.85717	peritoneal only	6.5052	2.75978	-1.41727	Muc16	mucin 16
scl50176.16.1_35-S	7.39269	3.21043	3.32549	-2.18169	peritoneal only	3.21043	2.22304	-4.33566	Msln	mesothelin
ri|B230323D24|PX00159L22|AK045917|2270-S	7.3644	9.01456	2.13899	-2.42972	peritoneal only	9.01456	3.44294	2.31702	Vat1l	vesicle amine transport protein 1 homolog-like (T. californica)
scl43499.19.1_1-S	7.35713	10.3552	0.626086	-7.18029	peritoneal only	10.3552	11.751	14.0214	Il31ra	interleukin 31 receptor A
scl27736.9.1_26-S	7.23598	13.6947	0.970329	-7.26549	peritoneal only	13.6947	7.45724	13.9665	Gabrb1	gamma-aminobutyric acid (GABA) A receptor, subunit beta 1
scl33993.13_72-S	7.17784	12.1623	1.74128	-3.53183	peritoneal only	12.1623	4.12217	6.96007	Plat	plasminogen activator, tissue
scl20046.9_689-S	7.06331	9.48459	1.3795	-5.97001	peritoneal only	9.48459	5.1202	6.83404	Mmp24	matrix metallopeptidase 24
scl0012560.2_1-S	6.98251	4.71516	1.11109	-7.21551	peritoneal only	4.71516	6.28437	4.23381	Cdh3	cadherin 3
scl0020256.2_48-S	6.95195	13.3756	0.72961	-7.16769	peritoneal only	13.3756	9.52832	15.9861	Clec11a	C-type lectin domain family 11, member a
scl50179.2_171-S	6.93724	7.76693	1.59064	-5.45137	peritoneal only	7.76693	4.36129	3.99614	Sox8	SRY-box containing gene 8
ri|E230013M07|PX00210M05|AK054036|1742-S	6.79201	10.0831	1.32135	-6.37734	peritoneal only	10.0831	5.14022	7.74524	Sorcs1	VPS10 domain receptor protein SORCS 1
scl39711.41_251-S	6.74557	8.42852	0.806452	-6.58124	peritoneal only	8.42852	8.3645	10.307	Cacna1g	calcium channel, voltage-dependent, T type, alpha 1G subunit
scl00104001.2_121-S	6.66685	5.43513	2.57516	-2.39115	peritoneal only	5.43513	2.58891	-2.00955	Rtn1	reticulon 1
GI_38081957-S	6.65951	7.41338	0.716154	-7.30761	peritoneal only	7.41338	9.29899	10.2005	Steap2	six transmembrane epithelial antigen of prostate 2
scl0013386.2_11-S	6.64617	3.40066	1.05288	-7.26745	peritoneal only	3.40066	6.31235	3.34937	Dlk1	delta-like 1 homolog (Drosophila)
scl42354.13_11-S	6.58662	4.53798	2.89467	-1.90412	peritoneal only	4.53798	2.27543	-3.37972	Rtn1	reticulon 1
scl27379.6_65-S	6.54421	8.13834	2.33638	-1.7619	peritoneal only	8.13834	2.801	0.392286	Oasl2	2'-5' oligoadenylate synthetase-like 2
scl17286.15.1_2-S	6.53278	2.44197	2.06456	-5.13134	peritoneal only	2.44197	3.16425	-2.12467	Selp	selectin, platelet
scl34412.1_2-S	6.40955	7.20993	2.07259	-3.31523	peritoneal only	7.20993	3.09253	0.87449	B3gnt9-ps	UDP-GlcNAc:betaGal beta-1,3-N-acetylglucosaminyltransferase 9, pseudogene
scl0252837.6_66-S	6.23717	9.79156	0.706361	-7.01431	peritoneal only	9.79156	8.83001	12.8092	Ccrl1	chemokine (C-C motif) receptor-like 1
scl022626.1_322-S	6.20044	3.00053	3.91353	-0.190375	peritoneal only	3.00053	1.58436	-5.80619	Slc23a3	solute carrier family 23 (nucleobase transporters), member 3
scl54857.20_22-S	6.00007	2.44939	1.48539	-6.17053	peritoneal only	2.44939	4.03939	-0.136963	Zfp185	zinc finger protein 185
scl0396184.1_71-S	5.98322	8.12703	1.98083	-3.10194	peritoneal only	8.12703	3.02056	1.71268	Flrt1	fibronectin leucine rich transmembrane protein 1
scl39846.10.1_37-S	5.93894	12.4109	0.905807	-7.2751	peritoneal only	12.4109	6.55652	13.3974	Accn1	amiloride-sensitive cation channel 1, neuronal (degenerin)
scl0064450.1_199-S	5.92655	6.40297	1.06261	-7.27648	peritoneal only	6.40297	5.57737	6.16722	Gpr85	G protein-coupled receptor 85
scl18421.6.1_66-S	5.84217	8.98912	0.561915	-6.81847	peritoneal only	8.98912	10.3969	13.8552	Ghrh	growth hormone releasing hormone
scl6164.1.1_126-S	5.6922	4.11538	1.81425	-5.10764	peritoneal only	4.11538	3.1375	-0.459173	5730409K12Rik	RIKEN cDNA 5730409K12 gene
scl014115.17_10-S	5.63826	7.2033	2.31984	-1.46648	peritoneal only	7.2033	2.43045	-0.831471	Fbln2	fibulin 2
scl00319408.1_94-S	5.63596	9.64157	1.49004	-5.22158	peritoneal only	9.64157	3.78242	5.79469	#N/A	no hit
scl0140792.13_120-S	5.50648	10.0343	2.15083	-0.812277	peritoneal only	10.0343	2.56017	1.73311	Colec12	collectin sub-family member 12
scl18005.4.1_0-S	5.46099	4.90138	1.87625	-4.49545	peritoneal only	4.90138	2.91059	-0.336874	1500015O10Rik	RIKEN cDNA 1500015O10 gene
scl31688.5.1_17-S	5.40493	8.23241	1.03772	-7.20501	peritoneal only	8.23241	5.20848	8.07229	Fosb	FBJ osteosarcoma oncogene B
scl026968.1_121-S	5.377	10.9639	1.10727	-6.72622	peritoneal only	10.9639	4.85608	9.99045	Islr	immunoglobulin superfamily containing leucine-rich repeat
scl40910.10_100-S	5.33273	2.43954	1.77894	-5.51956	peritoneal only	2.43954	2.9977	-1.59355	Fkbp10	FK506 binding protein 10
scl46071.24.1_0-S	5.3301	6.7238	1.31629	-6.15434	peritoneal only	6.7238	4.04935	4.29514	Enox1	ecto-NOX disulfide-thiol exchanger 1
scl0057776.1_221-S	5.24644	8.45128	1.76897	-3.65213	peritoneal only	8.45128	2.96582	2.66902	Ttyh1	tweety homolog 1 (Drosophila)
scl096875.3_23-S	5.23962	3.9703	1.35971	-6.63461	peritoneal only	3.9703	3.85347	1.71579	Prg4	proteoglycan 4 (megakaryocyte stimulating factor, articular superficial zone protein)
scl00100647.2_230-S	5.22456	0.397983	2.17337	-5.04604	peritoneal only	0.397983	2.40389	-4.09057	Upk3b	uroplakin 3B
scl49330.22.4_270-S	5.20158	4.93451	2.17864	-2.79542	peritoneal only	4.93451	2.38753	-1.93527	Chrd	chordin
scl31391.7.1_2-S	5.18278	5.37317	1.5041	-5.8691	peritoneal only	5.37317	3.44576	1.90959	Rcn3	reticulocalbin 3, EF-hand calcium binding domain
scl45060.6_526-S	5.16647	3.82057	1.98749	-4.29787	peritoneal only	3.82057	2.59949	-1.72393	Gng4	guanine nucleotide binding protein (G protein), gamma 4
scl0106635.1_0-S	5.12738	0.207179	2.55301	-4.15191	peritoneal only	0.207179	2.00837	-5.05083	AI661453	expressed sequence AI661453
scl18991.5.1_45-S	5.08905	2.90238	1.68975	-5.63188	peritoneal only	2.90238	3.01172	-1.01358	Mdk	midkine
scl012890.1_4-S	5.07918	2.92583	0.673068	-7.21722	peritoneal only	2.92583	7.5463	6.24147	Cplx2	complexin 2
ri|C730010K05|PX00086F11|AK050075|3881-S	4.99044	1.89938	1.49402	-6.16341	peritoneal only	1.89938	3.34027	-0.840786	#N/A	no hit
ri|E030041A17|PX00206L19|AK087272|1867-S	4.98613	9.90596	1.27365	-6.09135	peritoneal only	9.90596	3.91482	7.4684	Neo1	neogenin
scl018190.1_20-S	4.97052	3.24954	1.92134	-4.41126	peritoneal only	3.24954	2.587	-1.93394	Nrxn2	neurexin II
scl29329.1_464-S	4.95665	4.3714	1.2605	-6.84384	peritoneal only	4.3714	3.93228	2.62099	#N/A	no hit
scl0258245.1_228-S	4.93872	4.11351	1.14601	-7.13241	peritoneal only	4.11351	4.30947	3.23079	Olfr1036	olfactory receptor 1036
scl26911.1.1_139-S	4.93803	0.912358	0.743765	-6.49888	peritoneal only	0.912358	6.63924	3.14141	7330423F06Rik	RIKEN cDNA 7330423F06 gene
scl0068743.1_43-S	4.91785	6.51688	1.41522	-6.00212	peritoneal only	6.51688	3.47497	3.33566	Anln	anillin, actin binding protein
scl23783.5.1_1-S	4.82857	4.30372	2.17052	-3.06324	peritoneal only	4.30372	2.22461	-2.50153	Zbtb8a	zinc finger and BTB domain containing 8a
scl24582.2_41-S	4.82018	3.91838	2.86866	-0.55116	peritoneal only	3.91838	1.68029	-4.91678	Penk	preproenkephalin
scl46693.9.1_8-S	4.81877	6.41949	1.35979	-6.27832	peritoneal only	6.41949	3.54376	3.64658	Krt76	keratin 76
scl40131.12_470-S	4.81101	0.254905	1.59403	-6.35408	peritoneal only	0.254905	3.01814	-2.49819	Rnf112	ring finger protein 112
scl0099151.1_201-S	4.80762	6.53024	1.75326	-4.13669	peritoneal only	6.53024	2.74211	1.00014	Cercam	cerebral endothelial cell adhesion molecule
scl41866.19_12-S	4.6942	13.6146	1.21283	-6.28507	peritoneal only	13.6146	3.87047	11.3951	Aebp1	AE binding protein 1
scl26948.15.1061_6-S	4.60132	10.0608	1.33101	-5.46982	peritoneal only	10.0608	3.457	6.88518	6330406I15Rik	RIKEN cDNA 6330406I15 gene
scl18515.2.486_1-S	4.57418	2.72191	1.91454	-4.60417	peritoneal only	2.72191	2.38918	-2.47092	Ninl	ninein-like
ri|G430044L04|PH00001C10|AK089985|2326-S	4.54221	1.67656	1.44475	-6.45811	peritoneal only	1.67656	3.14395	-0.889723	Sfxn3	sideroflexin 3
scl52759.3_441-S	4.53223	8.73314	1.30658	-6.10106	peritoneal only	8.73314	3.46877	5.94737	#N/A	no hit
scl30134.18.1_125-S	4.50285	3.94703	2.92091	-0.156885	peritoneal only	3.94703	1.54159	-5.31595	Ephb6	Eph receptor B6
scl24349.9.180_10-S	4.49425	3.71421	1.82828	-4.54183	peritoneal only	3.71421	2.45818	-1.55545	Anks6	ankyrin repeat and sterile alpha motif domain containing 6
scl32679.14.1_2-S	4.43778	3.92901	0.981584	-7.30625	peritoneal only	3.92901	4.52104	4.42602	Tulp2	tubby-like protein 2
scl23466.19.1_1-S	4.36232	0.663702	1.57897	-6.1988	peritoneal only	0.663702	2.76277	-2.36649	Espn	espin
ri|4833408P15|PX00027P14|AK014667|2033-S	4.35703	5.92827	1.11146	-6.86795	peritoneal only	5.92827	3.92011	5.008	Glb1l	galactosidase, beta 1-like
scl46484.11_613-S	4.33321	4.37974	1.26362	-6.50535	peritoneal only	4.37974	3.42921	2.38176	Galntl2	UDP-N-acetyl-alpha-D-galactosamine:polypeptide N-acetylgalactosaminyltransferase-like 2
scl26154.16_189-S	4.3138	6.04435	2.13402	-1.78003	peritoneal only	6.04435	2.02144	-1.99445	#N/A	no hit
scl0020356.1_230-S	4.30338	2.70599	1.1376	-7.15192	peritoneal only	2.70599	3.78285	1.89635	Sema5a	sema domain, seven thrombospondin repeats (type 1 and type 1-like), transmembrane domain (TM) and short cytoplasmic domain, (semaphorin) 5A
scl51485.9_146-S	4.26877	1.29272	0.60273	-7.03594	peritoneal only	1.29272	7.08239	5.4755	Fgf1	fibroblast growth factor 1
scl45353.23.1_30-S	4.24016	5.40614	0.831497	-7.28291	peritoneal only	5.40614	5.09943	7.43293	Piwil2	piwi-like homolog 2 (Drosophila)
scl6163.1.1_218-S	4.22904	4.23319	1.60278	-5.25026	peritoneal only	4.23319	2.63858	-0.153432	Flrt1	fibronectin leucine rich transmembrane protein 1
scl000056.1_228-S	4.22328	12.1035	1.79913	-0.570945	peritoneal only	12.1035	2.34741	4.15784	B3gnt9-ps	UDP-GlcNAc:betaGal beta-1,3-N-acetylglucosaminyltransferase 9, pseudogene
scl18989.11.1_5-S	4.21718	0.0606484	1.16919	-7.09839	peritoneal only	0.0606484	3.60692	-0.73523	Creb3l1	cAMP responsive element binding protein 3-like 1
scl51758.6_6-S	4.19191	4.31649	1.56334	-5.40065	peritoneal only	4.31649	2.68138	0.131663	Zbtb7c	zinc finger and BTB domain containing 7C
scl00347722.2_310-S	4.15401	12.1364	1.17572	-6.57267	peritoneal only	12.1364	3.53316	10.2229	Agap1	ArfGAP with GTPase domain, ankyrin repeat and PH domain 1
scl39997.15.1_78-S	4.13793	4.52654	1.00737	-7.23506	peritoneal only	4.52654	4.10767	4.70799	Alox15	arachidonate 15-lipoxygenase
ri|4933426K21|PX00020B07|AK016936|1368-S	4.12329	7.15566	0.942444	-7.27967	peritoneal only	7.15566	4.3751	8.02576	#N/A	no hit
scl00241452.2_214-S	4.06825	3.61336	1.12937	-7.0799	peritoneal only	3.61336	3.60223	2.72922	Dhrs9	dehydrogenase/reductase (SDR family) member 9
scl46602.21_8-S	4.05804	0.210411	1.46004	-6.16029	peritoneal only	0.210411	2.7794	-2.36043	Nid2	nidogen 2
scl0094352.2_42-S	4.05524	0.00505094	1.22221	-7.06776	peritoneal only	0.00505094	3.31797	-1.11848	Loxl2	lysyl oxidase-like 2
scl50009.17.1_17-S	4.04469	8.43064	1.16135	-6.50077	peritoneal only	8.43064	3.48274	6.79755	C2	complement component 2 (within H-2S)
scl18706.10.1_133-S	4.03987	9.25101	1.3092	-5.87635	peritoneal only	9.25101	3.08574	6.13789	Kcnip3	Kv channel interacting protein 3, calsenilin
ri|A530029N19|PX00140J20|AK040842|1239-S	4.00595	0.862223	1.19717	-6.70543	peritoneal only	0.862223	3.34617	-0.367736	Glt8d2	glycosyltransferase 8 domain containing 2
scl0098733.2_280-S	3.94382	0.955612	2.01465	-4.44606	peritoneal only	0.955612	1.95757	-4.2338	#N/A	no hit
ri|A330078B09|PX00133A04|AK079617|2466-S	3.90484	5.07147	0.798677	-6.41387	peritoneal only	5.07147	4.88913	7.56503	Fgf9	fibroblast growth factor 9
scl49845.6.190_23-S	3.83099	4.8914	1.53832	-5.16956	peritoneal only	4.8914	2.49037	0.436918	Guca1a	guanylate cyclase activator 1a (retina)
scl0070019.1_250-S	3.83094	2.35135	1.49516	-5.9549	peritoneal only	2.35135	2.56222	-1.10054	2410039M03Rik	RIKEN cDNA 2410039M03 gene
ri|6720426B09|PX00059O23|AK020115|979-S	3.82736	5.17358	0.688422	-7.25692	peritoneal only	5.17358	5.55962	9.02292	#N/A	no hit
scl000652.1_102-S	3.81965	1.23697	1.32406	-6.7017	peritoneal only	1.23697	2.8848	-0.831446	Dlc1	deleted in liver cancer 1
ri|A230069E17|PX00129I04|AK038859|2481-S	3.8055	5.42599	1.09621	-7.1465	peritoneal only	5.42599	3.47149	4.70401	Gabrq	gamma-aminobutyric acid (GABA) A receptor, subunit theta
GI_38090072-S	3.79786	3.81455	2.43487	-0.909343	peritoneal only	3.81455	1.55978	-4.87585	Col6a5	collagen, type VI, alpha 5
scl0016196.1_211-S	3.79484	2.76937	0.652219	-7.27824	peritoneal only	2.76937	5.81836	6.79304	Il7	interleukin 7
scl0320078.9_68-S	3.79481	8.05944	1.93624	-0.748941	peritoneal only	8.05944	1.95989	-0.532814	Olfml2b	olfactomedin-like 2B
ri|5230401C23|PX00022C21|AK030347|3495-S	3.75431	2.13805	1.11911	-6.92311	peritoneal only	2.13805	3.35474	1.38389	#N/A	no hit
scl017474.5_5-S	3.72162	0.978266	2.4284	-2.67786	peritoneal only	0.978266	1.53254	-5.61545	Clec4d	C-type lectin domain family 4, member d
scl41166.7_90-S	3.69918	2.38721	1.80375	-4.46964	peritoneal only	2.38721	2.05083	-2.93915	Tmem98	transmembrane protein 98
scl064051.13_189-S	3.69201	1.07204	1.25275	-6.66278	peritoneal only	1.07204	2.94713	-0.582601	Sv2a	synaptic vesicle glycoprotein 2 a
scl0022420.2_231-S	3.68535	5.68312	2.04368	-1.50987	peritoneal only	5.68312	1.80329	-2.63428	Wnt6	wingless-related MMTV integration site 6
scl43262.30_332-S	3.65422	10.368	0.712153	-7.27452	peritoneal only	10.368	5.13123	14.3915	Dgkb	diacylglycerol kinase, beta
scl32676.9.1_1-S	3.60252	7.75429	1.7242	-2.49539	peritoneal only	7.75429	2.08939	0.650861	Plekha4	pleckstrin homology domain containing, family A (phosphoinositide binding specific) member 4
scl17027.7_391-S	3.59332	5.03553	2.01606	-1.62109	peritoneal only	5.03553	1.78235	-2.99048	Cd34	CD34 antigen
scl37797.29_0-S	3.57992	3.7933	0.604017	-7.23705	peritoneal only	3.7933	5.92686	8.84167	Col6a2	collagen, type VI, alpha 2
ri|4933417A14|PX00020D07|AK030197|2033-S	3.54509	5.71775	1.79934	-2.84123	peritoneal only	5.71775	1.97022	-1.28289	Ccin	calicin
scl0246707.2_7-S	3.51833	0.122702	1.99186	-4.25055	peritoneal only	0.122702	1.76635	-4.882	Emilin2	elastin microfibril interfacer 2
scl019223.1_1-S	3.50043	5.92602	1.27351	-6.33934	peritoneal only	5.92602	2.74865	3.23827	Ptgis	prostaglandin I2 (prostacyclin) synthase
scl41609.24.1_99-S	3.49906	3.5914	1.05991	-7.2401	peritoneal only	3.5914	3.30127	3.27501	Adamts2	a disintegrin-like and metallopeptidase (reprolysin type) with thrombospondin type 1 motif, 2
scl31899.2_128-S	3.49493	5.24194	0.785084	-7.26974	peritoneal only	5.24194	4.45166	8.16511	Ifitm1	interferon induced transmembrane protein 1
scl37201.7.1_109-S	3.46329	2.76526	0.744269	-7.18425	peritoneal only	2.76526	4.65328	5.96487	9530077C05Rik	RIKEN cDNA 9530077C05 gene
scl28139.11_347-S	3.45255	7.06497	0.850386	-7.27705	peritoneal only	7.06497	4.05998	9.23827	Steap2	six transmembrane epithelial antigen of prostate 2
scl0014172.1_43-S	3.4461	1.83387	0.833405	-6.91368	peritoneal only	1.83387	4.13496	3.87511	Fgf18	fibroblast growth factor 18
scl000588.1_2-S	3.43595	3.776	1.99966	-2.15235	peritoneal only	3.776	1.71826	-3.70465	Smpd3	sphingomyelin phosphodiesterase 3, neutral
scl067454.6_320-S	3.43279	1.22548	1.33681	-6.58021	peritoneal only	1.22548	2.5679	-1.14791	Ikbip	IKBKB interacting protein
scl35774.7_2-S	3.41368	4.45734	1.29594	-6.30367	peritoneal only	4.45734	2.63414	1.70612	Loxl1	lysyl oxidase-like 1
scl18858.8.1_25-S	3.41332	2.09619	0.558615	-7.17214	peritoneal only	2.09619	6.11033	7.78649	Scg5	secretogranin V
scl050917.1_181-S	3.40063	2.12035	1.61522	-5.17587	peritoneal only	2.12035	2.10536	-2.38187	Galns	galactosamine (N-acetyl)-6-sulfate sulfatase
scl013807.1_30-S	3.39666	0.738131	0.833114	-7.01665	peritoneal only	0.738131	4.07707	2.71942	Eno2	enolase 2, gamma neuronal
scl18159.25_509-S	3.37533	0.835051	2.80102	-0.907751	peritoneal only	0.835051	1.20503	-6.56642	Sulf1	sulfatase 1
scl35076.15.1_19-S	3.34352	9.53591	0.815911	-6.10038	peritoneal only	9.53591	4.09789	12.2462	Gas6	growth arrest specific 6
scl48393.15_330-S	3.34161	1.17961	0.761335	-7.30138	peritoneal only	1.17961	4.38915	4.02337	Nfkbiz	nuclear factor of kappa light polypeptide gene enhancer in B-cells inhibitor, zeta
scl0002621.1_925-S	3.33682	6.75706	1.01682	-7.2755	peritoneal only	6.75706	3.28162	6.78863	Mmp16	matrix metallopeptidase 16
scl23434.8.1_51-S	3.32212	4.5962	1.63807	-4.09267	peritoneal only	4.5962	2.02807	-1.15129	Mmp23	matrix metallopeptidase 23
scl50115.4.1_12-S	3.30606	1.61211	0.839154	-7.27609	peritoneal only	1.61211	3.93975	3.62523	Clps	colipase, pancreatic
scl0001441.1_330-S	3.28407	9.57282	1.08541	-7.08367	peritoneal only	9.57282	3.02564	8.60247	Adamts2	a disintegrin-like and metallopeptidase (reprolysin type) with thrombospondin type 1 motif, 2
scl21387.15_249-S	3.28227	4.2445	1.35932	-5.96802	peritoneal only	4.2445	2.41464	0.86243	Ak5	adenylate kinase 5
scl25312.3.1_124-S	3.27882	2.03978	0.992418	-7.22148	peritoneal only	2.03978	3.30387	2.42271	Gm12680	predicted gene 12680
scl25149.14.1_263-S	3.26256	4.32352	1.49953	-5.04699	peritoneal only	4.32352	2.17572	-0.317253	Slc1a7	solute carrier family 1 (glutamate transporter), member 7
scl43923.16.1_30-S	3.25877	0.962026	1.21867	-6.75864	peritoneal only	0.962026	2.67404	-0.701587	Dbn1	drebrin 1
scl0002547.1_9-S	3.24615	0.767607	1.20079	-6.97453	peritoneal only	0.767607	2.70334	-0.59911	Enpp2	ectonucleotide pyrophosphatase/phosphodiesterase 2
scl23803.3_247-S	3.22627	3.6871	0.612257	-4.34136	peritoneal only	3.6871	5.26947	9.1356	Gjb3	gap junction protein, beta 3
scl22869.17.1_4-S	3.21147	0.915972	0.889924	-7.17215	peritoneal only	0.915972	3.60871	2.38804	Mtmr11	myotubularin related protein 11
scl000659.1_40-S	3.14959	6.1733	1.426	-4.89296	peritoneal only	6.1733	2.2087	1.53264	Cdh11	cadherin 11
scl31804.3.1_22-S	3.14387	4.76451	0.669543	-7.11861	peritoneal only	4.76451	4.69554	9.55479	Cox6b2	cytochrome c oxidase subunit VIb polypeptide 2
scl19431.33.1_37-S	3.1284	1.84259	1.0665	-7.17616	peritoneal only	1.84259	2.93333	1.47208	Garnl3	GTPase activating RANGAP domain-like 3
scl39943.24_68-S	3.12316	1.2667	1.5894	-5.2486	peritoneal only	1.2667	1.965	-3.05001	Sgsm2	small G protein signaling modulator 2
scl074577.1_28-S	3.12114	3.14226	1.00153	-6.90373	peritoneal only	3.14226	3.11636	3.30483	Glb1l	galactosidase, beta 1-like
scl17495.7_75-S	3.0306	1.8541	1.78699	-3.60992	peritoneal only	1.8541	1.69592	-4.05539	5430435G22Rik	RIKEN cDNA 5430435G22 gene
ri|2600006K01|ZX00060O18|AK011165|872-S	3.01736	4.33876	1.17392	-6.84251	peritoneal only	4.33876	2.57034	2.58418	2600006K01Rik	RIKEN cDNA 2600006K01 gene
scl31984.10.1_28-S	3.00094	3.63121	1.10024	-6.7634	peritoneal only	3.63121	2.72754	2.64282	Htra1	HtrA serine peptidase 1
scl51269.7_133-S	2.99855	2.00221	2.07212	-2.18401	peritoneal only	2.00221	1.4471	-5.2938	Mapk4	mitogen-activated protein kinase 4
scl0078070.2_207-S	2.99592	0.248644	1.16134	-7.06016	peritoneal only	0.248644	2.57971	-0.828904	Cpt1c	carnitine palmitoyltransferase 1c
scl27549.3_136-S	2.98948	2.22685	0.906267	-7.25509	peritoneal only	2.22685	3.29868	3.68021	Fgf5	fibroblast growth factor 5
scl30391.3_48-S	2.98788	0.491567	0.661983	-5.7638	peritoneal only	0.491567	4.51353	4.80138	Nxph1	neurexophilin 1
scl37315.11_411-S	2.98607	0.969601	0.789262	-6.84228	peritoneal only	0.969601	3.78337	3.53915	Casp12	caspase 12
scl29544.11_278-S	2.95334	0.641989	1.06265	-6.8678	peritoneal only	0.641989	2.77921	0.239526	Mfap5	microfibrillar associated protein 5
scl0073827.1_213-S	2.90445	4.76055	1.38433	-5.03177	peritoneal only	4.76055	2.09809	0.46513	1110012D08Rik	RIKEN cDNA 1110012D08 gene
scl23625.5_278-S	2.90044	1.73159	1.01287	-7.22005	peritoneal only	1.73159	2.86359	1.89853	Nbl1	neuroblastoma, suppression of tumorigenicity 1
scl47324.7_72-S	2.88313	0.625876	0.972279	-7.27286	peritoneal only	0.625876	2.96533	1.26551	Snord123	small nucleolar RNA, C/D box 123
scl31586.7.1_8-S	2.85051	4.63707	0.881627	-7.20383	peritoneal only	4.63707	3.23324	6.42284	Selv	selenoprotein V
scl056552.6_38-S	2.83175	1.99099	1.53619	-4.78476	peritoneal only	1.99099	1.84335	-2.72062	Vmn2r26	vomeronasal 2, receptor 26
scl0319629.2_215-S	2.82026	3.89976	0.807724	-7.22183	peritoneal only	3.89976	3.49162	6.72266	#N/A	no hit
scl068178.1_250-S	2.80207	0.137788	0.806639	-6.86331	peritoneal only	0.137788	3.47377	2.63027	Cgnl1	cingulin-like 1
scl0003182.1_19-S	2.79833	1.74625	1.58987	-4.49305	peritoneal only	1.74625	1.7601	-3.28051	Rassf2	Ras association (RalGDS/AF-6) domain family member 2
ri|9630031D17|PX00115K16|AK036056|1674-S	2.79135	8.11554	1.48163	-2.78395	peritoneal only	8.11554	1.88397	1.61315	5430435G22Rik	RIKEN cDNA 5430435G22 gene
scl0056191.2_129-S	2.75743	3.21037	0.989172	-7.02968	peritoneal only	3.21037	2.78761	3.62428	Tro	trophinin
scl39486.4.1_56-S	2.74385	0.623138	1.03875	-7.26448	peritoneal only	0.623138	2.6415	0.559982	1700023F06Rik	RIKEN cDNA 1700023F06 gene
scl15751.8_2-S	2.73566	0.182772	0.790912	-7.02589	peritoneal only	0.182772	3.45887	2.97965	Sertad4	SERTA domain containing 4
scl49983.22_274-S	2.73024	0.416025	1.02905	-7.21293	peritoneal only	0.416025	2.65316	0.436925	Ddr1	discoidin domain receptor family, member 1
scl23726.8.8_267-S	2.681	0.529069	1.99185	-2.7597	peritoneal only	0.529069	1.34598	-5.85368	Smpdl3b	sphingomyelin phosphodiesterase, acid-like 3B
scl0018007.1_62-S	2.67801	1.81353	0.947103	-6.98827	peritoneal only	1.81353	2.82758	2.76344	Neo1	neogenin
scl0000100.1_15-S	2.66594	3.17999	0.598517	-6.96522	peritoneal only	3.17999	4.45423	9.50388	Tnxb	tenascin XB
scl0232313.7_283-S	2.64072	2.59202	1.25196	-6.19708	peritoneal only	2.59202	2.10926	-0.0821558	Gxylt2	glucoside xylosyltransferase 2
scl012833.1_126-S	2.61676	4.48019	0.53379	-6.37596	peritoneal only	4.48019	4.90223	12.5492	Col6a1	collagen, type VI, alpha 1
scl38511.3.1_54-S	2.6052	3.35335	1.1757	-6.76822	peritoneal only	3.35335	2.21588	1.39734	Dcn	decorin
ri|B430209H23|PX00071I02|AK046621|1927-S	2.56685	2.19255	1.02688	-6.89194	peritoneal only	2.19255	2.49967	2.04015	Fbn1	fibrillin 1
ri|C230095O06|PX00177N13|AK049058|896-S	2.56505	1.3608	0.870757	-7.18762	peritoneal only	1.3608	2.94577	3.33755	#N/A	no hit
scl28980.8_345-S	2.56406	0.883802	1.20788	-6.73981	peritoneal only	0.883802	2.12278	-1.03773	Scrn1	secernin 1
scl21831.10.1_25-S	2.53781	4.04309	0.920164	-7.11987	peritoneal only	4.04309	2.75799	5.53034	Ecm1	extracellular matrix protein 1
scl00214137.2_222-S	2.53505	1.5716	1.04585	-7.19007	peritoneal only	1.5716	2.42392	1.31557	Arhgap29	Rho GTPase activating protein 29
scl37836.1.334_25-S	2.53305	1.3803	1.54113	-4.66441	peritoneal only	1.3803	1.64363	-3.61033	4930533K18Rik	RIKEN cDNA 4930533K18 gene
scl0016998.2_125-S	2.52556	3.32295	0.99544	-6.90333	peritoneal only	3.32295	2.53713	3.56476	Ltbp3	latent transforming growth factor beta binding protein 3
scl47123.18_98-S	2.52252	0.0483127	0.848493	-6.95272	peritoneal only	0.0483127	2.97295	2.24	Ndrg1	N-myc downstream regulated gene 1
scl00223723.2_285-S	2.51454	4.699	1.58264	-2.82837	peritoneal only	4.699	1.58882	-2.36963	Ttll12	tubulin tyrosine ligase-like family, member 12
scl0002353.1_840-S	2.50643	1.14563	0.74931	-7.25071	peritoneal only	1.14563	3.34499	4.97534	Trim9	tripartite motif-containing 9
scl0246154.2_131-S	2.5055	0.499056	0.929497	-7.14982	peritoneal only	0.499056	2.69555	1.68203	Vasn	vasorin
scl018542.3_8-S	2.4656	0.415712	1.35961	-5.99079	peritoneal only	0.415712	1.81347	-2.85149	Pcolce	procollagen C-endopeptidase enhancer protein
scl28417.13.1_3-S	2.42084	3.25842	0.934693	-7.17587	peritoneal only	3.25842	2.58998	4.55241	Leprel2	leprecan-like 2
scl37796.6_295-S	2.40667	1.21387	0.537545	-6.87475	peritoneal only	1.21387	4.47715	8.76005	Col6a1	collagen, type VI, alpha 1
scl068908.1_119-S	2.3805	2.20349	0.896323	-7.03885	peritoneal only	2.20349	2.65585	4.05482	Fam114a1	family with sequence similarity 114, member A1
ri|1110034E14|ZA00008I01|AK075649|1728-S	2.3772	1.44688	1.16275	-6.90288	peritoneal only	1.44688	2.04447	-0.23432	Man2b2	mannosidase 2, alpha B2
scl33383.18_43-S	2.37297	5.44662	0.785661	-6.03105	peritoneal only	5.44662	3.02035	9.46875	Cdh3	cadherin 3
scl0016949.2_233-S	2.33131	1.65923	1.0615	-7.15264	peritoneal only	1.65923	2.19623	1.13239	Loxl1	lysyl oxidase-like 1
scl26675.19.1_6-S	2.31446	0.54599	0.921761	-7.19987	peritoneal only	0.54599	2.51091	1.9833	Man2b2	mannosidase 2, alpha B2
scl38453.7.1_27-S	2.31118	1.26138	0.739953	-5.70392	peritoneal only	1.26138	3.12341	5.57996	Csrp2	cysteine and glycine-rich protein 2
scl0067896.2_111-S	2.30819	1.49151	0.580127	-2.40195	peritoneal only	1.49151	3.97878	8.61417	Ccdc80	coiled-coil domain containing 80
scl27076.34.1_159-S	2.30796	1.79769	0.990474	-7.28104	peritoneal only	1.79769	2.33016	2.12755	Stag3	stromal antigen 3
scl0072475.2_71-S	2.3035	2.14617	0.869343	-7.30804	peritoneal only	2.14617	2.6497	4.48255	Ssbp3	single-stranded DNA binding protein 3
scl53253.2.1_47-S	2.29761	5.33532	0.935458	-7.2175	peritoneal only	5.33532	2.45614	6.71155	Dmrt3	doublesex and mab-3 related transcription factor 3
scl37833.23.1_1-S	2.28292	1.96933	1.39021	-5.15128	peritoneal only	1.96933	1.64214	-2.55638	Bicc1	bicaudal C homolog 1 (Drosophila)
scl37963.14.1_0-S	2.27433	1.56057	0.344937	-6.88003	peritoneal only	1.56057	6.59347	14.3126	Fam184a	family with sequence similarity 184, member A
scl094280.14_180-S	2.24226	1.17211	0.96163	-7.19185	peritoneal only	1.17211	2.33172	2.04019	Sfxn3	sideroflexin 3
scl012406.1_153-S	2.21327	2.93861	1.008	-7.27942	peritoneal only	2.93861	2.1957	3.12515	Serpinh1	serine (or cysteine) peptidase inhibitor, clade H, member 1
scl21996.1.1532_72-S	2.17524	3.03677	0.98102	-7.27308	peritoneal only	3.03677	2.21732	3.6261	Kirrel	kin of IRRE like (Drosophila)
scl34835.2_621-S	2.15649	2.17539	0.855625	-7.26098	peritoneal only	2.17539	2.52037	4.76754	2900073C17Rik	RIKEN cDNA 2900073C17 gene
scl42798.1.1_138-S	2.15323	0.156041	0.933355	-7.27302	peritoneal only	0.156041	2.30698	1.42625	#N/A	no hit
scl47757.5.8_11-S	2.15207	2.95807	1.08438	-6.7169	peritoneal only	2.95807	1.98461	1.7775	Lgals1	lectin, galactose binding, soluble 1
scl0003544.1_55-S	2.12073	2.05672	0.314917	-4.40005	peritoneal only	2.05672	6.73427	16.7687	Fez1	fasciculation and elongation protein zeta 1 (zygin I)
scl39929.9.1_88-S	2.1003	2.40417	1.02112	-7.26856	peritoneal only	2.40417	2.05686	2.37705	Doc2b	double C2, beta
scl35962.15.2_53-S	2.09894	0.603607	0.76069	-6.6512	peritoneal only	0.603607	2.75926	4.86202	Abcg4	ATP-binding cassette, sub-family G (WHITE), member 4
scl0231997.1_5-S	2.04318	1.50016	0.856456	-7.23959	peritoneal only	1.50016	2.38563	4.33374	Fkbp14	FK506 binding protein 14
scl0016976.2_258-S	2.03307	3.66223	1.61176	-0.895242	peritoneal only	3.66223	1.2614	-4.98317	Lrpap1	low density lipoprotein receptor-related protein associated protein 1
scl29997.10_261-S	2.00555	2.6008	0.866675	-7.25753	peritoneal only	2.6008	2.31407	5.40278	Fkbp9	FK506 binding protein 9
scl0065971.2_58-S	0.702803	-7.28228	76.5374	19.5757	pleural + pericardial only	19.5757	0.00918248	20.5964	Tbata	thymus, brain and testes associated
IGHV1S36_M13788_Ig_heavy_variable_1S36_40-S	0.497496	-7.25396	36.4925	10.5147	pleural + pericardial only	10.5147	0.0136328	13.5058	#N/A	immunoglobin
IGKV4-77_AJ235940_Ig_kappa_variable_4-77_18-S	0.333363	-6.76399	32.9886	12.3852	pleural + pericardial only	12.3852	0.0101054	17.0468	#N/A	immunoglobin
IGKV4-52_AJ239198_Ig_kappa_variable_4-52_18-S	0.503126	-7.00827	28.2204	7.82462	pleural + pericardial only	7.82462	0.0178285	10.883	#N/A	immunoglobin
IGHV1S131_AF304551_Ig_heavy_variable_1S131_48-S	0.876104	-7.14836	24.7005	10.5214	pleural + pericardial only	10.5214	0.0354691	11.2171	#N/A	immunoglobin
IGKV3-2_X16954_Ig_kappa_variable_3-2_18-S	0.323225	-7.03277	24.5891	2.08035	pleural + pericardial only	2.08035	0.013145	6.26172	#N/A	immunoglobin
IGHV1S28_X02460_Ig_heavy_variable_1S28_13-S	0.842312	-7.29578	23.1037	16.5355	pleural + pericardial only	16.5355	0.0364579	17.4076	#N/A	immunoglobin
IGKV13-84_AJ231273_Ig_kappa_variable_13-84_10-S	0.203062	-7.20584	21.9641	3.17064	pleural + pericardial only	3.17064	0.00924517	9.23544	#N/A	immunoglobin
IGHV8S5_U23020_Ig_heavy_variable_8S5_188-S	0.529022	-7.30958	21.5361	12.5106	pleural + pericardial only	12.5106	0.0245645	15.7136	#N/A	immunoglobin
scl0001110.1_65-S	0.290174	-7.29759	21.0325	3.92003	pleural + pericardial only	3.92003	0.0137965	9.0513	Igk	immunoglobin
IGHV8S6_U23021_Ig_heavy_variable_8S6_61-S	0.593902	-7.21535	20.8212	9.97032	pleural + pericardial only	9.97032	0.0285239	12.629	#N/A	immunoglobin
IGKV12-89_AJ235950_Ig_kappa_variable_12-89_265-S	0.211748	-0.207191	20.396	10.1429	pleural + pericardial only	10.1429	0.0103818	17.2001	#N/A	immunoglobin
IGHV1S124_AF025449_Ig_heavy_variable_1S124_11-S	0.552699	-7.25292	20.3194	9.18986	pleural + pericardial only	9.18986	0.0272006	12.1847	#N/A	immunoglobin
IGHV1S1_J00532_Ig_heavy_variable_1S1_209-S	0.561729	-7.21282	20.2475	16.5045	pleural + pericardial only	16.5045	0.0277431	19.4134	#N/A	immunoglobin
IGKV4-73_AJ231216_Ig_kappa_variable_4-73_18-S	0.235078	-7.21345	19.0876	6.08657	pleural + pericardial only	6.08657	0.0123158	12.5161	#N/A	immunoglobin
scl019373.1_8-S	1.1437	-7.16598	18.3883	10.3476	pleural + pericardial only	10.3476	0.0621972	9.63162	Rag1	recombination activating gene 1
IGHV8S9_U23024_Ig_heavy_variable_8S9_28-S	0.626354	-7.24274	18.1987	9.10457	pleural + pericardial only	9.10457	0.0344175	11.5928	#N/A	immunoglobin
IGKV4-54_AJ231223_Ig_kappa_variable_4-54_15-S	0.19798	-7.22171	17.8685	2.47165	pleural + pericardial only	2.47165	0.0110799	8.94368	#N/A	immunoglobin
IGKV12-67_AJ235933_Ig_kappa_variable_12-67_27-S	0.484	-7.26075	17.5203	12.7936	pleural + pericardial only	12.7936	0.0276252	16.6407	#N/A	immunoglobin
IGHV11S1_M35502$Y00743_Ig_heavy_variable_11S1_324-S	0.420703	-7.05059	17.0612	8.37997	pleural + pericardial only	8.37997	0.0246584	12.7912	#N/A	immunoglobin
scl016051.1_210-S	0.224225	-6.0968	16.9514	7.74835	pleural + pericardial only	7.74835	0.0132275	14.7907	Igh-V11	immunoglobin
IGHV8S7_U23022_Ig_heavy_variable_8S7_163-S	0.41542	-7.21829	16.8747	5.54309	pleural + pericardial only	5.54309	0.0246179	9.78279	#N/A	immunoglobin
IGHV1S59_L17134_Ig_heavy_variable_1S59_150-S	0.496345	-7.21943	16.0834	7.3391	pleural + pericardial only	7.3391	0.0308608	10.9913	#N/A	immunoglobin
IGKV3-1_X16955_Ig_kappa_variable_3-1_109-S	0.39932	-7.24729	16.0102	5.74446	pleural + pericardial only	5.74446	0.0249415	10.2536	#N/A	immunoglobin
IGKV2-116_AJ277843_Ig_kappa_variable_2-116_195-S	0.860492	-7.25286	15.849	7.84798	pleural + pericardial only	7.84798	0.054293	8.91647	#N/A	immunoglobin
IGKV4-72_AJ231219_Ig_kappa_variable_4-72_18-S	0.27707	-6.92701	15.6586	5.27058	pleural + pericardial only	5.27058	0.0176945	11.307	#N/A	immunoglobin
GI_38073828-S	0.669077	-7.2244	15.5189	13.9279	pleural + pericardial only	13.9279	0.0431135	16.2514	#N/A	immunoglobin
scl42836.5.1_252-S	0.331904	-7.12428	15.0851	8.06985	pleural + pericardial only	8.06985	0.0220021	13.7233	Serpina3b	serine (or cysteine) peptidase inhibitor, clade A, member 3B
IGHV10S2_AF064443_Ig_heavy_variable_10S2_7-S	0.868865	-7.22165	14.5784	3.67538	pleural + pericardial only	3.67538	0.0595995	4.39315	#N/A	immunoglobin
IGHV1S6_J00536_Ig_heavy_variable_1S6_10-S	0.669346	-7.30768	14.5511	7.31392	pleural + pericardial only	7.31392	0.0459998	9.57966	#N/A	immunoglobin
IGHV1S13_X00160$K00706_Ig_heavy_variable_1S13_8-S	0.142067	-7.20371	14.3873	0.805374	pleural + pericardial only	0.805374	0.00987448	8.33412	#N/A	immunoglobin
IGKV4-80_AJ231213_Ig_kappa_variable_4-80_91-S	0.753305	-7.24043	14.3535	11.009	pleural + pericardial only	11.009	0.0524823	12.6934	#N/A	immunoglobin
IGHV1S120_AF025443_Ig_heavy_variable_1S120_8-S	0.194533	-7.24136	14.2396	3.92186	pleural + pericardial only	3.92186	0.0136615	11.3134	#N/A	immunoglobin
IGKV8-16_Y15977_Ig_kappa_variable_8-16_28-S	0.257722	-7.29946	14.2349	3.15902	pleural + pericardial only	3.15902	0.0181049	9.27446	#N/A	immunoglobin
IGHV1S35_M12376_Ig_heavy_variable_1S35_13-S	0.0987063	-6.96382	14.2012	1.56727	pleural + pericardial only	1.56727	0.00695055	10.6605	#N/A	immunoglobin
IGHV14S2_X03572$L29396_Ig_heavy_variable_14S2_16-S	0.396706	-7.22159	14.1042	4.90153	pleural + pericardial only	4.90153	0.0281268	9.5272	#N/A	immunoglobin
IGKV6-29_AJ235967_Ig_kappa_variable_6-29_14-S	0.627091	-7.23936	13.962	12.6482	pleural + pericardial only	12.6482	0.0449141	15.413	#N/A	immunoglobin
IGHV5S2_AF290969_Ig_heavy_variable_5S2_113-S	0.825818	-7.11836	13.865	4.30866	pleural + pericardial only	4.30866	0.0595613	5.40036	#N/A	immunoglobin
IGKV4-68_AJ231222_Ig_kappa_variable_4-68_18-S	0.159258	-7.16494	13.4822	0.519402	pleural + pericardial only	0.519402	0.0118124	7.69627	#N/A	immunoglobin
IGHV1S3_J00533_Ig_heavy_variable_1S3_214-S	0.669467	-7.22028	13.3391	18.6909	pleural + pericardial only	18.6909	0.0501882	21.0791	#N/A	immunoglobin
IGHV3S2_M12435_Ig_heavy_variable_3S2_32-S	0.490366	-7.22999	13.3079	4.0245	pleural + pericardial only	4.0245	0.0368478	7.64796	#N/A	immunoglobin
IGHV6S4_K00694_Ig_heavy_variable_6S4_26-S	0.272541	-7.25219	13.1614	9.2812	pleural + pericardial only	9.2812	0.0207076	16.1743	#N/A	immunoglobin
IGKV10-95_AF029261_Ig_kappa_variable_10-95_20-S	0.265782	-7.02021	12.5924	3.29822	pleural + pericardial only	3.29822	0.0211065	9.5781	#N/A	immunoglobin
IGKV4-71_AJ231218_Ig_kappa_variable_4-71_20-S	0.0984144	-7.06722	12.4777	1.6517	pleural + pericardial only	1.6517	0.00788725	11.1771	#N/A	immunoglobin
IGKV4-79_AJ231214_Ig_kappa_variable_4-79_9-S	0.208251	-6.87193	12.4115	2.66837	pleural + pericardial only	2.66837	0.0167788	9.80911	#N/A	immunoglobin
IGHV1S55_M34985_Ig_heavy_variable_1S55_9-S	1.01607	-7.10259	12.3951	10.9273	pleural + pericardial only	10.9273	0.0819739	10.8244	#N/A	immunoglobin
scl52718.5.1_51-S	0.791738	-7.21729	12.1191	9.47357	pleural + pericardial only	9.47357	0.0653296	11.0939	Oosp1	oocyte secreted protein 1
IGHV1S133_AF304553_Ig_heavy_variable_1S133_89-S	0.898094	-7.29415	11.9369	8.64532	pleural + pericardial only	8.64532	0.0752371	9.33201	#N/A	immunoglobin
IGHV1S31_X02463_Ig_heavy_variable_1S31_40-S	0.49719	-7.18436	11.9104	6.74494	pleural + pericardial only	6.74494	0.0417444	10.7399	#N/A	immunoglobin
IGHV1S34_X02467_Ig_heavy_variable_1S34_71-S	0.550446	-7.28306	11.8489	9.31754	pleural + pericardial only	9.31754	0.0464554	12.932	#N/A	immunoglobin
scl0016017.1_1-S	0.935897	-7.30913	11.723	8.25851	pleural + pericardial only	8.25851	0.0798341	8.75892	#N/A	immunoglobin
IGKV14-126_AJ231238_Ig_kappa_variable_14-126_270-S	0.359863	-1.77324	11.4349	9.4359	pleural + pericardial only	9.4359	0.0314705	15.3386	#N/A	immunoglobin
IGKV5-43_AJ235973_Ig_kappa_variable_5-43_8-S	0.137229	-7.19114	11.4038	1.13811	pleural + pericardial only	1.13811	0.0120336	9.55678	#N/A	immunoglobin
IGHV1S53_M34983_Ig_heavy_variable_1S53_15-S	0.574278	-7.26993	11.3822	10.6934	pleural + pericardial only	10.6934	0.0504542	14.2662	#N/A	immunoglobin
IGHV14S1_X03571$M12813_Ig_heavy_variable_14S1_9-S	0.204401	-7.28482	11.2051	2.85177	pleural + pericardial only	2.85177	0.0182418	10.3809	#N/A	immunoglobin
IGHV5S6_AF290959_Ig_heavy_variable_5S6_176-S	0.669148	-7.21688	10.5133	8.24401	pleural + pericardial only	8.24401	0.0636479	10.8386	#N/A	immunoglobin
IGHV12S1_M22439_Ig_heavy_variable_12S1_339-S	0.260494	-6.50945	10.4791	3.1114	pleural + pericardial only	3.1114	0.0248585	9.86078	#N/A	immunoglobin
IGKV4-53_AJ231231_Ig_kappa_variable_4-53_12-S	0.491681	-5.86276	10.3974	6.55741	pleural + pericardial only	6.55741	0.0472888	10.804	#N/A	immunoglobin
IGHV1S129_AF304548_Ig_heavy_variable_1S129_110-S	0.846176	-7.27036	10.127	19.7819	pleural + pericardial only	19.7819	0.0835561	20.8833	#N/A	immunoglobin
IGKV1-131_AJ231197_Ig_kappa_variable_1-131_20-S	0.15872	-5.7428	10.0224	1.77489	pleural + pericardial only	1.77489	0.0158366	10.2893	#N/A	immunoglobin
IGKV1-132_AJ231198_Ig_kappa_variable_1-132_20-S	0.185315	-6.33267	9.94015	0.334132	pleural + pericardial only	0.334132	0.0186431	7.67657	#N/A	immunoglobin
IGKV8-21_Y15982_Ig_kappa_variable_8-21_114-S	0.465964	-7.2292	9.75653	3.63998	pleural + pericardial only	3.63998	0.0477591	7.9136	#N/A	immunoglobin
GI_38084237-S	0.848381	-7.22432	9.44123	15.0143	pleural + pericardial only	15.0143	0.0898592	16.1624	#N/A	immunoglobin
IGKV4-70_AJ235943_Ig_kappa_variable_4-70_149-S	0.0948947	-7.28621	9.33327	0.345287	pleural + pericardial only	0.345287	0.0101674	10.3781	#N/A	immunoglobin
scl0016065.1_275-S	0.523085	-7.23321	9.27519	3.95037	pleural + pericardial only	3.95037	0.0563961	7.75071	Igh-VS107	immunoglobin
IGHV1S30_X02462_Ig_heavy_variable_1S30_12-S	0.613622	-7.2674	9.09315	3.7161	pleural + pericardial only	3.7161	0.0674817	6.84445	#N/A	immunoglobin
scl50974.4.1_30-S	3.20079	-1.87131	9.02737	5.67349	pleural + pericardial only	5.67349	0.354565	-2.42522	Gng13	guanine nucleotide binding protein (G protein), gamma 13
IGHV5S19_AF120461_Ig_heavy_variable_5S19_186-S	0.38763	-7.07149	8.93458	1.82526	pleural + pericardial only	1.82526	0.0433853	6.79835	#N/A	immunoglobin
IGKV4-91_AJ231229_Ig_kappa_variable_4-91_29-S	0.226818	-4.8248	8.90031	6.51975	pleural + pericardial only	6.51975	0.0254843	15.0248	#N/A	immunoglobin
IGKV2-137_AJ231263_Ig_kappa_variable_2-137_15-S	0.142471	-6.52943	8.70383	0.514655	pleural + pericardial only	0.514655	0.0163688	9.37922	#N/A	immunoglobin
IGKV6-20_Y15981_Ig_kappa_variable_6-20_12-S	0.422603	-7.2358	8.67652	0.700144	pleural + pericardial only	0.700144	0.0487065	5.02256	#N/A	immunoglobin
IGLV2_J00599_Ig_lambda_variable_2_12-S	0.190167	-7.14591	8.67372	0.737974	pleural + pericardial only	0.737974	0.0219245	8.56388	#N/A	immunoglobin
IGHV6S1_X03398_Ig_heavy_variable_6S1_144-S	0.819637	-7.28638	8.37303	5.71491	pleural + pericardial only	5.71491	0.0978901	7.13569	#N/A	immunoglobin
IGHV5S14_AF290968_Ig_heavy_variable_5S14_1-S	0.638015	-7.30135	8.34858	1.45806	pleural + pericardial only	1.45806	0.076422	3.98457	#N/A	immunoglobin
GI_38095651-S	0.229409	-6.44062	8.19539	3.50387	pleural + pericardial only	3.50387	0.0279925	11.6289	#N/A	immunoglobin
IGKV4-86_X05555_Ig_kappa_variable_4-86_0-S	0.143294	-7.28607	8.04139	0.297902	pleural + pericardial only	0.297902	0.0178196	9.1557	#N/A	immunoglobin
GI_38096418-S	0.48504	-7.18495	8.03795	2.0355	pleural + pericardial only	2.0355	0.0603437	6.03082	#N/A	immunoglobin
IGHV1S15_K00603_Ig_heavy_variable_1S15_188-S	0.901959	-7.28375	7.78295	16.047	pleural + pericardial only	16.047	0.115889	16.8523	#N/A	immunoglobin
IGKV5-45_AJ235974_Ig_kappa_variable_5-45_8-S	0.391959	-7.29249	7.66564	3.48372	pleural + pericardial only	3.48372	0.0511319	9.1265	#N/A	immunoglobin
IGHV8S4_U23019_Ig_heavy_variable_8S4_130-S	0.525553	-7.2733	7.65756	3.56609	pleural + pericardial only	3.56609	0.0686319	7.85405	#N/A	immunoglobin
IGKV11-125_AJ231256_Ig_kappa_variable_11-125_15-S	0.826839	-7.21354	7.54014	8.73676	pleural + pericardial only	8.73676	0.109658	10.1902	#N/A	immunoglobin
IGHV5S4_X03399_Ig_heavy_variable_5S4_218-S	0.692815	-7.16303	7.50568	15.0472	pleural + pericardial only	15.0472	0.0923054	17.8582	#N/A	immunoglobin
scl31518.8.1_186-S	2.03922	-4.18711	7.48257	6.50485	pleural + pericardial only	6.50485	0.27253	1.04714	Zbtb32	zinc finger and BTB domain containing 32
IGKV12-66_AJ235934_Ig_kappa_variable_12-66_22-S	0.958975	-7.28615	7.48034	12.4735	pleural + pericardial only	12.4735	0.128199	12.8142	#N/A	immunoglobin
IGHV1S4_J00534_Ig_heavy_variable_1S4_10-S	0.648511	-7.30866	7.44846	3.78316	pleural + pericardial only	3.78316	0.0870664	6.65492	#N/A	immunoglobin
IGHV5S9_AF290971_Ig_heavy_variable_5S9_0-S	0.882509	-7.16131	7.3893	2.97762	pleural + pericardial only	2.97762	0.119431	3.89169	#N/A	immunoglobin
IGKV16-104_AJ235936_Ig_kappa_variable_16-104_171-S	0.429633	-7.16559	7.30861	10.5191	pleural + pericardial only	10.5191	0.0587845	16.5348	#N/A	immunoglobin
IGHV14S3_X03573$M12991X03573_Ig_heavy_variable_14S3_203-S	0.866291	-7.29498	7.24393	2.52672	pleural + pericardial only	2.52672	0.119588	3.5461	#N/A	immunoglobin
IGHV5S24_AF120469_Ig_heavy_variable_5S24_99-S	1.0156	-7.22345	7.02988	2.43477	pleural + pericardial only	2.43477	0.14447	2.38103	#N/A	immunoglobin
scl53135.9.1_1-S	1.17992	-7.12647	6.68939	1.53544	pleural + pericardial only	1.53544	0.176387	0.66233	Dntt	deoxynucleotidyltransferase, terminal
scl0002383.1_139-S	0.176289	-6.99543	6.68495	4.97842	pleural + pericardial only	4.97842	0.0263711	15.4606	AI324046	expressed sequence AI324046
IGHM_V00818_Ig_heavy_constant_mu_941-S	0.276904	-4.3724	6.54609	4.3031	pleural + pericardial only	4.3031	0.0423007	12.4575	Igh-6	immunoglobin
IGKV9-119_AJ231236_Ig_kappa_variable_9-119_19-S	0.372778	-7.285	6.35449	2.15967	pleural + pericardial only	2.15967	0.0586638	8.55027	#N/A	immunoglobin
scl27566.4_105-S	0.715972	-7.21539	6.16944	0.49978	pleural + pericardial only	0.49978	0.116051	2.46178	Cxcl13	chemokine (C-X-C motif) ligand 13
IGKV8-27_AJ235946_Ig_kappa_variable_8-27_34-S	0.233736	-7.26129	6.14413	1.38942	pleural + pericardial only	1.38942	0.0380422	9.77408	#N/A	immunoglobin
IGKV4-58_K00884_Ig_kappa_variable_4-58_130-S	0.281184	-7.29021	5.92841	3.52362	pleural + pericardial only	3.52362	0.0474299	11.7805	#N/A	immunoglobin
IGHV1S14_K00707$X00161_Ig_heavy_variable_1S14_164-S	0.595057	-7.23655	5.77778	1.97752	pleural + pericardial only	1.97752	0.102991	5.40391	#N/A	immunoglobin
scl49427.3.1_283-S	0.617562	-7.21247	5.57357	2.46309	pleural + pericardial only	2.46309	0.110802	5.8078	Tnfrsf17	tumor necrosis factor receptor superfamily, member 17
ri|A530050N04|PX00141D16|AK080033|1810-S	0.390457	-7.266	5.47656	4.19779	pleural + pericardial only	4.19779	0.071296	10.989	A530050N04Rik	RIKEN cDNA A530050N04 gene
GI_38084293-S	0.678825	-7.2819	5.44355	10.0922	pleural + pericardial only	10.0922	0.124703	13.5228	#N/A	immunoglobin
IGKV8-24_AJ235944_Ig_kappa_variable_8-24_169-S	0.152268	-7.28426	5.39569	0.979512	pleural + pericardial only	0.979512	0.0282203	11.8326	#N/A	immunoglobin
IGKV9-128_AJ231245_Ig_kappa_variable_9-128_15-S	0.604521	-7.26993	5.3168	5.87502	pleural + pericardial only	5.87502	0.1137	10.0311	#N/A	immunoglobin
IGKV8-31_AJ235957_Ig_kappa_variable_8-31_3-S	0.111789	-7.24634	5.27112	0.396183	pleural + pericardial only	0.396183	0.0212078	12.458	#N/A	immunoglobin
scl016019.1_4-S	0.330354	-4.49183	5.24864	6.76654	pleural + pericardial only	6.76654	0.0629409	15.1966	Igh-6	immunoglobin
scl44226.7.1_11-S	0.529007	-7.23452	5.10642	0.756651	pleural + pericardial only	0.756651	0.103596	5.26417	Prss16	protease, serine, 16 (thymus)
scl19548.10.1_41-S	1.835	-2.27957	4.69445	9.52391	pleural + pericardial only	9.52391	0.390887	2.54844	Fcna	ficolin A
scl41383.7.120_88-S	0.887353	-7.18219	4.56853	3.93328	pleural + pericardial only	3.93328	0.194232	4.99991	Aurkb	aurora kinase B
IGHV5S23_AF120466_Ig_heavy_variable_5S23_110-S	0.851512	-7.3074	4.46775	1.83208	pleural + pericardial only	1.83208	0.190591	3.11927	#N/A	immunoglobin
scl00114564.1_150-S	0.543436	-6.97288	4.44628	0.763357	pleural + pericardial only	0.763357	0.122223	5.07234	Csprs	component of Sp100-rs
GI_38073794-S	1.05412	-7.21197	4.43176	0.924991	pleural + pericardial only	0.924991	0.237856	0.677288	#N/A	immunoglobin
scl32159.5.1_80-S	1.19101	-6.53734	4.3974	11.4745	pleural + pericardial only	11.4745	0.270844	9.50394	Calcb	calcitonin-related polypeptide, beta
scl018140.7_263-S	1.01917	-7.10272	4.26172	0.379943	pleural + pericardial only	0.379943	0.239144	0.286902	Uhrf1	ubiquitin-like, containing PHD and RING finger domains, 1
scl41337.5.1_185-S	1.71526	-5.77438	4.11561	0.323268	pleural + pericardial only	0.323268	0.416768	-3.41124	Tm4sf5	transmembrane 4 superfamily member 5
scl30660.11.1_1-S	1.59481	-5.87154	4.11003	1.04784	pleural + pericardial only	1.04784	0.388029	-2.52859	Kif22	kinesin family member 22
scl0319170.1_323-S	0.835774	-7.20022	4.09612	0.378282	pleural + pericardial only	0.378282	0.20404	1.74197	Hist1h2an	histone cluster 1, H2an
scl19836.10.1_260-S	0.608066	-7.24134	4.08404	0.203904	pleural + pericardial only	0.203904	0.148888	3.80621	Spo11	sporulation protein, meiosis-specific, SPO11 homolog (S. cerevisiae)
scl19511.8_175-S	2.44946	-3.10659	3.85525	0.597919	pleural + pericardial only	0.597919	0.635356	-5.67464	Slc2a6	solute carrier family 2 (facilitated glucose transporter), member 6
scl0382062.2_10-S	1.57718	-6.0886	3.84067	0.123307	pleural + pericardial only	0.123307	0.410651	-3.02265	AB124611	cDNA sequence AB124611
IGHV3S1_K01569_Ig_heavy_variable_3S1_104-S	0.8259	-7.27388	3.80449	2.50817	pleural + pericardial only	2.50817	0.217086	4.57732	#N/A	immunoglobin
scl9030.1.1_127-S	0.687181	-7.28275	3.75282	4.25742	pleural + pericardial only	4.25742	0.18311	8.16946	B230209E15Rik	RIKEN cDNA B230209E15 gene
IGHG1_J00453$V00793_Ig_heavy_constant_gamma_1_792-S	0.930766	-7.29143	3.70112	2.64308	pleural + pericardial only	2.64308	0.251483	3.5257	#N/A	immunoglobin
IGHV5S26_AF120471_Ig_heavy_variable_5S26_158-S	0.587238	-7.28746	3.61347	4.24768	pleural + pericardial only	4.24768	0.162513	9.52813	Igh-V7183	immunoglobin
scl36799.4_9-S	0.48703	-7.06795	3.51459	0.846109	pleural + pericardial only	0.846109	0.138574	6.77334	2810417H13Rik	RIKEN cDNA 2810417H13 gene
IGHV8S10_U23025_Ig_heavy_variable_8S10_26-S	0.533692	-7.11203	3.51085	0.524178	pleural + pericardial only	0.524178	0.152012	5.64529	#N/A	immunoglobin
IGHV5S25_AF120470_Ig_heavy_variable_5S25_146-S	0.738188	-7.26012	3.47291	2.65255	pleural + pericardial only	2.65255	0.212556	5.71661	Igh-V7183	immunoglobin
scl00381777.1_252-S	0.844843	-7.30953	3.36572	5.9214	pleural + pericardial only	5.9214	0.251014	8.13626	Igk-V5	immunoglobin
scl39630.11_261-S	2.27808	-3.10486	3.33907	0.304157	pleural + pericardial only	0.304157	0.68225	-5.85167	Stac2	SH3 and cysteine rich domain 2
GI_20886296-S	1.08513	-7.02609	3.25586	6.79363	pleural + pericardial only	6.79363	0.333284	5.76421	Plac1l	placenta-specific 1-like
scl0381822.1_19-S	1.08511	-7.17429	3.23899	1.76323	pleural + pericardial only	1.76323	0.335013	1.22453	1190002F15Rik	RIKEN cDNA 1190002F15 gene
IGHV3S3_M61217_Ig_heavy_variable_3S3_70-S	0.933657	-7.29796	3.12697	5.50447	pleural + pericardial only	5.50447	0.298583	6.38041	#N/A	immunoglobin
scl0170745.21_29-S	2.50295	-1.59795	3.07544	0.510801	pleural + pericardial only	0.510801	0.813853	-6.49066	Xpnpep2	X-prolyl aminopeptidase (aminopeptidase P) 2, membrane-bound
scl28116.21_503-S	2.13929	-2.84823	2.91109	0.175327	pleural + pericardial only	0.175327	0.734877	-5.98812	Sema3d	sema domain, immunoglobulin domain (Ig), short basic domain, secreted, (semaphorin) 3D
scl41132.3.1_4-S	1.15125	-7.02412	2.89934	2.62037	pleural + pericardial only	2.62037	0.397073	1.28061	Expi	extracellular proteinase inhibitor
IGHV8S8_U23023_Ig_heavy_variable_8S8_130-S	0.846623	-7.26985	2.87897	1.04903	pleural + pericardial only	1.04903	0.294072	3.19035	#N/A	immunoglobin
scl0107993.3_117-S	1.05462	-7.1986	2.81112	0.332826	pleural + pericardial only	0.332826	0.375159	-0.058852	Bfsp2	beaded filament structural protein 2, phakinin
scl012228.1_44-S	0.951269	-7.19166	2.64837	1.58489	pleural + pericardial only	1.58489	0.35919	2.31626	Btg3	B-cell translocation gene 3
scl0381413.1_190-S	0.347684	-7.2645	2.44729	0.885275	pleural + pericardial only	0.885275	0.142069	12.0325	Gpr176	G protein-coupled receptor 176
IGKV8-26_AJ235945_Ig_kappa_variable_8-26_14-S	0.897433	-7.22848	2.40415	6.1985	pleural + pericardial only	6.1985	0.373285	8.20935	#N/A	immunoglobin
GI_38073304-S	0.775005	-7.25271	2.32348	0.0542083	pleural + pericardial only	0.0542083	0.333553	3.11607	A530032D15Rik	RIKEN cDNA A530032D15Rik gene
IGKV1-122_D00082_Ig_kappa_variable_1-122_127-S	0.875969	-7.27376	2.2539	0.495004	pleural + pericardial only	0.495004	0.388646	2.24267	#N/A	immunoglobin
scl016011.3_113-S	1.62005	-2.48108	2.15121	2.19547	pleural + pericardial only	2.19547	0.753087	-4.94337	Igfbp5	insulin-like growth factor binding protein 5
scl24887.7_12-S	1.58379	-3.30798	2.15025	1.3343	pleural + pericardial only	1.3343	0.736557	-4.93761	Sdc3	syndecan 3
GI_38074854-S	1.2855	-5.06839	2.1088	4.45579	pleural + pericardial only	4.45579	0.609589	-0.130858	Cybrd1	cytochrome b reductase 1
scl26031.4.1_17-S	1.76299	-2.09557	2.01822	0.00566278	pleural + pericardial only	0.00566278	0.873538	-6.49066	Rilpl2	Rab interacting lysosomal protein-like 2
