# Supplementary material
Source: publisher figshare collection journal article supplement (https://plos.figshare.com/articles/dataset/_/132767)
Supplement: Supplementary file 1 [file 1 › Table_S4.xls]

## Sheet: Sheet1
Table2: Gene Ontologies enriched in Mesothelial tissues
BOTH				p-val
GO:0007155	chst4 flrt2 lgals7 aplp1 anxa9 cldn15 has1 cdon	8	960	0.000462	cell adhesion
GO:0016021	spns3 chst4 flrt2 nkain4 smpd3 fam70a sez6l cdon has1 upk3b slitrk4 cybrd1 trem2 aplp1 cldn15 ccdc109b gpm6a	17	6700	0.00196	integral to membrane
GO:0022610	chst4 flrt2 lgals7 aplp1 anxa9 cldn15 has1 cdon	8	960	0.000462	biological adhesion
GO:0031224	spns3 chst4 flrt2 nkain4 smpd3 fam70a sez6l cdon has1 upk3b slitrk4 cybrd1 trem2 aplp1 cldn15 ccdc109b gpm6a	17	6732	0.00196	intrinsic to membrane
GO:0044421	flrt2 rspo1 wnt2b lgals7 aplp1 tnfrsf11b has1 sulf1	8	910	0.000462	extracellular region part
Peritoneal
GO:0044421	col6a2 dcn c2 fgf18 flrt1 cpz lamc3 lgals1 mmp16 mmp24 fbln2 fgf9 il7wnt6 fgf1 dlk1 muc2 tnxb ecm1 igfbp6 efemp1 emilin2 adamts19 adamts2mdk loxl2 sulf1 mfap5 prg4 fbn1 htra1 fgf5 col6a1 nid2 loxl1	35	910	7.73e-18	extracellular region part
GO:0005578	col6a2 emilin2 dcn adamts19 adamts2 flrt1 cpz lamc3 mmp16 mmp24fbln2 wnt6 mfap5 fbn1 tnxb ecm1 col6a1 loxl1 nid2 efemp1	20	421	3.4e-11	proteinaceous extracellular matrix
GO:0007275	dcn rtn1 smpd3 fgf18 nrxn2 fosb lgals1 piwil2 il31ra fgf9 il7 wnt6 dmrt3fgf1 dlk1 chrd nlgn1 cdh11 sema5a aebp1 accn1 fez1 ccin gjb3 mdkpcolce tro sox8 csrp2 fbn1 bicc1 disp1 neo1 fgf5 isl1 dbn1	36	2299	1.56e-10	multicellular organismal development
GO:0032502	casp12 dcn rtn1 smpd3 fgf18 nrxn2 fosb lgals1 piwil2 il31ra fgf9 il7 gas6wnt6 dmrt3 fgf1 dlk1 chrd nlgn1 cdh11 sema5a aebp1 igfbp6 dhrs9 accn1fez1 ccin mdk gjb3 loxl2 kcnip3 pcolce tro dlc1 sulf1 csrp2 sox8 fbn1bicc1 htra1 disp1 fgf5 neo1 isl1 dbn1	45	3347	4.81e-10	developmental process
GO:0022610	col6a2 emilin2 fez1 flrt1 loxl2 nrxn2 lamc3 tro dlc1 msln ttyh1 ddr1 cd34tnxb cercam cdh3 muc16 nlgn1 selp neo1 cdh11 sema5a aebp1 col6a1nid2 islr	26	960	7.03e-10	biological adhesion
GO:0007155	col6a2 emilin2 fez1 flrt1 loxl2 nrxn2 lamc3 tro dlc1 msln ttyh1 ddr1 cd34tnxb cercam cdh3 muc16 nlgn1 selp neo1 cdh11 sema5a aebp1 col6a1nid2 islr	26	960	7.03e-10	cell adhesion
GO:0032501	dcn rtn1 plat smpd3 c2 fgf18 nrxn2 fosb lgals1 piwil2 il31ra mmp16 fgf9 il7guca1a wnt6 dmrt3 crb2 fgf1 dlk1 chrd cdh3 nlgn1 penk cdh11 sema5aaebp1 efemp1 accn1 fez1 ccin mdk gjb3 tulp2 adamts2 clps pcolce trocsrp2 sox8 fbn1 bicc1 disp1 fgf5 neo1 isl1 dbn1	47	3822	8.91e-09	multicellular organismal process
GO:0005509	rcn3 dgkb ltbp3 galns doc2b fkbp9 kcnip3 fkbp10 mmp16 mmp24 galntl2fbln2 sulf1 lrpap1 gas6 guca1a fbn1 crb2 cdh3 fkbp14 cacna1g cdh11nid2 efemp1	24	1458	1.84e-07	calcium ion binding
GO:0005615	c2 mdk fgf18 loxl2 lgals1 fgf9 il7 sulf1 mfap5 prg4 fbn1 fgf1 htra1 dlk1muc2 fgf5 igfbp6	17	528	2.59e-07	extracellular space
GO:0048856	dhrs9 accn1 fez1 dcn rtn1 gjb3 mdk fgf18 nrxn2 lgals1 il31ra fgf9 il7 dlc1gas6 csrp2 sox8 fbn1 fgf1 htra1 chrd nlgn1 fgf5 cdh11 sema5a aebp1dbn1 igfbp6 isl1	29	2005	3.24e-07	anatomical structure development
GO:0030246	man2b2 clec4d colec12 mdk lgals1 galntl2 fgf9 lrpap1 itln1 fgf1 lgals2cd34 clec11a tnxb selp zg16	16	478	3.74e-07	carbohydrate binding
GO:0005886	eno2 smpd3 flrt1 gria3 gpr85 mmp24 mmp16 il31ra gabrb1 msln sv2alrpap1 gng4 ttyh1 crb2 steap2 ddr1 enpp2 cd34 cdh3 muc13 nlgn1 selpcacna1g cdh11 enox1 ndrg1 accn1 fez1 gabrq gjb3 alox15 cd109 kcnip3cgnl1 tro itln1 ifitm1 cercam stra6 muc16 neo1 ccrl1	43	3816	2.04e-06	plasma membrane
GO:0048731	accn1 fez1 dcn rtn1 gjb3 mdk fgf18 nrxn2 lgals1 il31ra fgf9 il7 sox8 csrp2fbn1 fgf1 chrd nlgn1 fgf5 cdh11 sema5a aebp1 dbn1 isl1	24	1605	2.82e-06	system development
GO:0007267	accn1 smpd3 mdk fgf18 nrxn2 scg5 fgf9 il7 ghrh wnt6 fgf1 nlgn1 fgf5 neo1penk sema5a dbn1	17	640	2.82e-06	cell-cell signaling
GO:0005515	casp12 col6a2 dcn ltbp3 fgf18 flrt1 zbtb7c fosb lgals1 piwil2 fgf9 il7 mslngas6 fgf1 tnxb anln nlgn1 creb3l1 penk efemp1 emilin2 fez1 dgkb ccin espnpcolce tro sox8 itln1 fbn1 htra1 ifitm1 cplx2 abcg4 cercam muc16 fgf5 isl1ccrl1 loxl1 nid2 rcn3 colec12 nrxn2 lamc3 wasf1 il31ra ghrh lrpap1 ttyh1vasn sorcs1 ddr1 cd34 enpp2 clec11a cdh3 selp cdh11 igfbp6 islr ndrg1accn1 serpinh1 trim9 mdk cd109 kcnip…	75	9005	4.51e-05	protein binding
GO:0016020	col6a2 eno2 tmem119 glt8d2 smpd3 cpt1c doc2b flrt1 kirrel gria3 mmp16scrn1 kcnab1 msln slc1a7 gng4 sv2a guca1a upk3b tmem151a nlgn1creb3l1 ptgis fez1 gabrq clec4d olfml2b gjb3 cgnl1 tro itln1 ifitm1 cox6b2abcg4 cercam stra6 muc16 ccrl1 nid2 rtn1 colec12 ephb6 nrxn2 lamc3gpr85 il31ra mmp24 gabrb1 lrpap1 ttyh1 crb2 steap2 vasn sorcs1 ddr1dlk1 cd34 enpp2 cdh3 muc13 selp cacna1g cdh11 sema5a enox1 nd…	79	9747	6.39e-05	membrane
Pleural + Pericardial only
No significant enrichment
